# Supplementary material for: Photocatalytic dehydrogenative C(sp2)–P coupling reaction between dibenzo[b,f][1,4]oxazepanes and phosphine oxides
Source: Royal Society of Chemistry journal article supplement (doi:10.1039/d4cy00955j), 2024-01-01
Supplement: d4cy00955j1.pdf [file d4cy00955j1.pdf]

# Photocatalytic Dehydrogenative C(sp<sup>2</sup>)-P Coupling Reaction Between Dibenzo[*b,f*][1,4]oxazepanes and Phosphine Oxides

Zhaotian Wu,<sup>a,†</sup> Xuefei Sha,<sup>a,c,†</sup> Shan Wang,<sup>a</sup> Huan Yang,<sup>a</sup> Shaojun Zheng,<sup>a</sup> Chunhui Jiang<sup>\*,a</sup> Shu-Yang Chen<sup>\*,b</sup> and Hongfei Lu<sup>\*,a</sup>

*a.* School of Environmental and Chemical Engineering, Jiangsu University of Science and Technology, Zhenjiang, Jiangsu 212100, China.

*b.* College of Chemistry and Pharmaceutical Engineering, Nanyang Normal University, Nanyang 473061, China

*c.* Nantong No.1 High School of Jiangsu Province, Nantong, Jiangsu 226001, China

Email: [chemjiang@just.edu.cn](mailto:chemjiang@just.edu.cn), [Shuyang868@sohu.com](mailto:Shuyang868@sohu.com), [zjluf1979@just.edu.cn](mailto:zjluf1979@just.edu.cn)

## Supporting Information

|                                                                                      |    |
|--------------------------------------------------------------------------------------|----|
| <b>1. General Information</b> .....                                                  | 2  |
| <b>2. Substrate Preparation</b> .....                                                | 2  |
| <b>3. General Procedure</b> .....                                                    | 3  |
| <b>4. Time-Yield Correlation Experiments</b> .....                                   | 3  |
| <b>5. Comparative Tabular Data</b> .....                                             | 4  |
| <b>6. Characterization</b> .....                                                     | 4  |
| <b>7. <sup>1</sup>H NMR, <sup>13</sup>C NMR and <sup>31</sup>P NMR Spectra</b> ..... | 17 |

## 1. General Information

$^1\text{H}$ -NMR,  $^{13}\text{C}$ -NMR and  $^{31}\text{P}$ -NMR spectra were recorded with solvent  $\text{CDCl}_3$  on JNM-ECZ400S/L1 400 spectrometer (400 MHz for  $^1\text{H}$ , 101 MHz for  $^{13}\text{C}$  and 162 MHz for  $^{31}\text{P}$ ). Chemical shifts were reported in parts per million (ppm), and the residual solvent peak was used as an internal reference: proton (chloroform  $\delta$  7.26), carbon (chloroform  $\delta$  77.16). Multiplicity was indicated as follows: s (singlet), d (doublet), t (triplet), q (quartet), m (multiplet), dd (doublet of doublet), td (doublet of triplet). Exact ESI mass spectra were recorded on a Bruker Daltonics MicroTOF-Q. ESI-MS were obtained on a Thermo-ITQ. Mass spectral data (MS) was recorded using an Agilent-6110 mass spectrometer. For thin layer chromatography (TLC), pre-coated Qingdao Haiyang TLC plates (GF254) were used, and compounds were visualized with a UV light at 254 nm. Flash chromatographic separations were performed on 200-300 mesh silica gel (from Qingdao Haiyang Chem. Company, Ltd.). Unless otherwise noted, all reagents were purchased from commercial sources (Adamas, Energy, Aldrich) and used as received without further purification. Solvents were dried and purified according to the procedure from "Purification of Laboratory Chemicals book". Dibenzo[*b,f*][1,4]oxazepine derivatives **1** were prepared according to the reported literature (Y. R. Jorapur, G. Rajagopal, P. J. Saikia and R. R. Pal, *Tetrahedron Letters*, 2008, **49**, 1495-1497).

## 2. Substrate Preparation

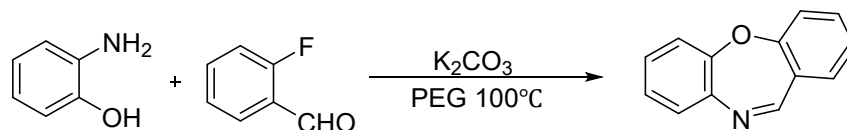

Polyethylene glycol (8.0 g) was added into a 100 ml round-bottomed flask and heated in an oil bath at 70 °C until the polyethylene glycol melted, then potassium carbonate (0.6 g, 4.0 mmol), 2-aminophenol (0.6 g, 4.4 mmol) and 2-fluorobenzaldehyde (0.417 g, 4.0 mmol) were added successively. The reaction mixture was heated at 100 °C for 5 h. TLC monitoring confirmed that the raw material reaction was complete. Post-treatment: Transfer the reaction system to 500 ml glass beaker, and after the mixture is cooled to room temperature, add 150 ml distilled water to remove the PEG. Then, ethyl acetate (3×50 ml) and saturated salt water (3×50 ml) were extracted successively,

anhydrous sodium sulfate was dried, and the resulting organic phase was removed under vacuum conditions. A light-yellow solid was obtained by silica gel chromatography (ethyl acetate: petroleum ether =1:10, v/v). Various **1a** derivatives can be obtained by using the corresponding reaction materials.

### 3. General Procedure

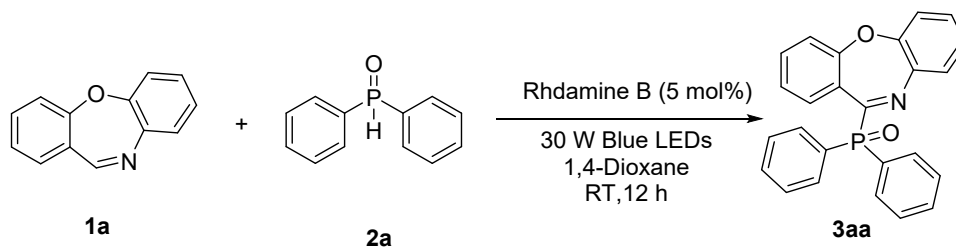

All reactions were performed in 10 ml reaction tubes. The reaction of dibenzo[*b,f*][1,4]oxazepine derivative **1a** (19.5 mg, 0.1 mmol) and diphenyl phosphine **2a** (40.4 mg, 0.2 mmol) and 5 mol% rhodamine B (5.4 mg) in 1,4-dioxane (1.0 mL) solvent was carried out under aerobic (air) conditions at room temperature by irradiation with 30 W blue LEDs and the reaction mixture was stirred for 12 h at room temperature. The electrodes were then cleaned with 1,4-dioxane, and then the combined solvents were dried with anhydrous sodium sulfate, and the solvents were removed by distillation under reduced pressure, followed by column chromatographic separation and purification (petroleum ether: ethyl acetate = 10:1) to obtain the desired product (35.6 mg, 90%).

### 4. Time-Yield Correlation Experiments

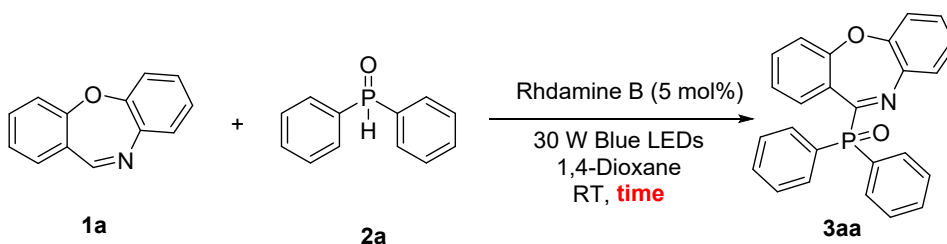

|                  |     |    |    |    |    |    |    |    |    |    |    |    |    |
|------------------|-----|----|----|----|----|----|----|----|----|----|----|----|----|
| <b>Time (h)</b>  | 0.5 | 1  | 2  | 3  | 4  | 5  | 6  | 7  | 8  | 9  | 10 | 11 | 12 |
| <b>Yield (%)</b> | 23  | 25 | 31 | 43 | 52 | 59 | 67 | 70 | 74 | 78 | 81 | 85 | 90 |

)

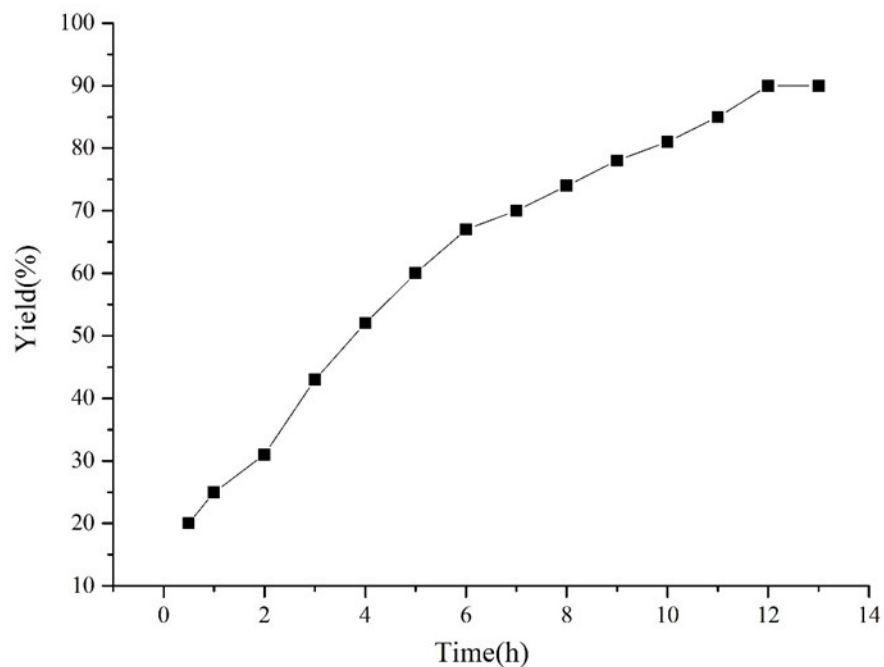

**Time-Yield plot**

## 5. Comparative Tabular Data

| entry    | oxidizing agent                   | catalyst                       | temperature | yield      | Ref.             |
|----------|-----------------------------------|--------------------------------|-------------|------------|------------------|
| 1        | /                                 | Pd(OAc) <sub>2</sub> (10 mol%) | 80 °C       | 76%        | 1                |
| 2        | Mn(acac) <sub>3</sub><br>(3.0 eq) | /                              | 80 °C       | 94%        | 2                |
| <b>3</b> | <b>O<sub>2</sub></b>              | <b>rhodamine B (5 mol%)</b>    | <b>RT</b>   | <b>90%</b> | <b>This work</b> |

1. W. Hu, F. Teng, H. Hu, S. Luo and Q. Zhu, *J. Org. Chem.*, 2019, **84**, 6524-6535.
2. X. Liu, S. Yuan, Y. Liu, M. Ni, J. Xu, S. Gui, Y.-Y. Peng and Q. Ding, *J. Org. Chem.*, 2023, **88**, 198-210.

## 6. Characterization

### Dibenzo[*b, f*][1,4]oxazepin-11-yl-diphenylphosphine oxide **3aa**

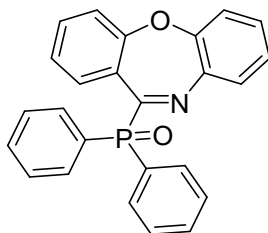

**3aa**

Synthesize according to general procedure. Isolated yield: 35.6 mg, 90% yield.

**<sup>1</sup>H NMR** (400 MHz, Chloroform-*d*)  $\delta$  8.16 (dd,  $J = 8.2, 1.6$  Hz, 1H), 7.97 (ddt,  $J = 11.8, 6.8, 1.6$  Hz, 4H), 7.54–7.50 (m, 1H), 7.50–7.45 (m, 4H), 7.44 (dt,  $J = 5.0, 1.7$  Hz, 1H), 7.42–7.39 (m, 1H), 7.26–7.20 (m, 2H), 7.17 (d,  $J = 6.3$  Hz, 1H), 7.15 (d,  $J = 6.9$  Hz, 2H).

**<sup>13</sup>C NMR** (101 MHz, Chloroform-*d*)  $\delta$  168.77 (d,  $J = 125.0$  Hz), 161.47 (d,  $J = 7.1$  Hz), 152.20, 140.51 (d,  $J = 27.4$  Hz), 133.70, 132.26 (d,  $J = 9.1$  Hz), 132.07 (d,  $J = 2.7$  Hz), 131.99 (d,  $J = 104.0$  Hz), 130.56, 129.87, 128.65, 128.48 (d,  $J = 12.1$  Hz), 126.68 (d,  $J = 27.1$  Hz), 125.81, 125.30, 121.14, 120.90. **<sup>31</sup>P NMR** (162 MHz, Chloroform-*d*)  $\delta$  26.95.

**MS** (HRMS)  $m/z$  calcd for C<sub>25</sub>H<sub>19</sub>NO<sub>2</sub>P (M+H)<sup>+</sup> = 396.1148, found = 396.1153.

**(8-fluorodibenzo[*b, f*] [1,4]oxazepin-11-yl)diphenylphosphine oxide 3ba**

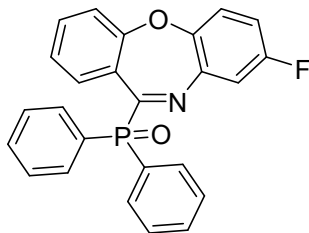

**3ba**

Synthesize according to general procedure. Isolated yield: 28.9 mg, 70% yield.

**<sup>1</sup>H NMR** (400 MHz, Chloroform-*d*)  $\delta$  8.15 (dd,  $J = 7.9, 1.7$  Hz, 1H), 7.97–7.89 (m, 4H), 7.54–7.49 (m, 2H), 7.48–7.43 (m, 4H), 7.42–7.39 (m, 1H), 7.16 (td,  $J = 7.6, 1.2$  Hz, 1H), 7.12 (dt,  $J = 8.2, 1.3$  Hz, 1H), 7.08 (ddd,  $J = 8.6, 5.1, 0.7$  Hz, 1H), 6.94–6.91 (m, 1H), 6.90 (dd,  $J = 3.2, 2.3$  Hz, 1H).

**<sup>13</sup>C NMR** (101 MHz, Chloroform-*d*)  $\delta$  170.37 (d,  $J = 123.0$  Hz), 161.50 (d,  $J = 7.0$  Hz), 159.92 (d,  $J = 244.2$  Hz), 148.38 (d,  $J = 2.9$  Hz),

141.26 (d,  $J = 38.6$  Hz), 133.99, 132.26, 132.17, 131.14, 130.71, 128.55 (d,  $J = 12.2$  Hz), 126.53 (d,  $J = 26.5$  Hz), 125.47, 121.90 (d,  $J = 9.2$  Hz), 120.75, 116.12 (d,  $J = 23.4$  Hz), 114.69 (d,  $J = 24.3$  Hz).  $^{31}\text{P}$  NMR (162 MHz, Chloroform- $d$ )  $\delta$  27.26. MS (HRMS)  $m/z$  calcd for  $\text{C}_{25}\text{H}_{18}\text{FNO}_2\text{P}$  ( $\text{M}+\text{H}$ ) $^+$  = 414.1054, found = 414.1058.

**(8-chlorodibenzo[*b, f*][1,4]oxazepin-11-yl)diphenylphosphine oxide 3ca**

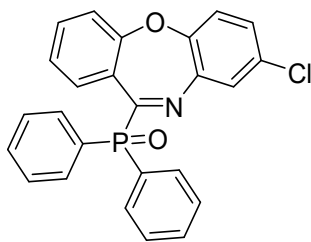

**3ca**

Synthesize according to general procedure. Isolated yield: 30.8 mg, 72% yield.

$^1\text{H}$  NMR (400 MHz, Chloroform- $d$ )  $\delta$  8.12 (dd,  $J = 7.9, 1.6$  Hz, 1H), 7.96–7.88 (m, 4H), 7.56–7.51 (m, 2H), 7.50–7.45 (m, 4H), 7.45–7.41 (m, 1H), 7.21–7.16 (m, 3H), 7.13 (dt,  $J = 8.2, 1.2$  Hz, 1H), 7.07 (d,  $J = 8.5$  Hz, 1H).  $^{13}\text{C}$  NMR (101 MHz, Chloroform- $d$ )  $\delta$  170.46 (d,  $J = 123.1$  Hz), 161.29 (d,  $J = 6.9$  Hz), 150.86, 141.24 (d,  $J = 27.6$  Hz), 134.01, 132.25, 132.16, 130.97 (d,  $J = 20.5$  Hz), 130.73, 129.40, 128.62, 128.50, 128.11, 126.48 (d,  $J = 26.5$  Hz), 125.56, 122.19, 120.82.  $^{31}\text{P}$  NMR (162 MHz, Chloroform- $d$ )  $\delta$  27.21. MS (HRMS)  $m/z$  calcd for  $\text{C}_{25}\text{H}_{18}\text{ClNO}_2\text{P}$  ( $\text{M}+\text{H}$ ) $^+$  = 430.0758, found = 430.0763.

**(8-bromodibenzo[*b, f*][1,4]oxazepin-11-yl)diphenylphosphine oxide 3da**

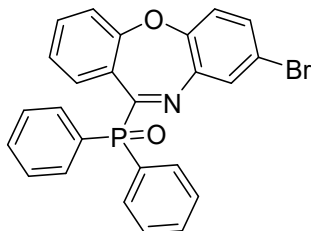

**3da**

Synthesize according to general procedure. Isolated yield: 31.2 mg, 66% yield.

**<sup>1</sup>H NMR** (400 MHz, Chloroform-*d*) δ 8.14 (dd, *J* = 7.9, 1.6 Hz, 1H), 7.98–7.90 (m, 4H), 7.57–52 (m, 2H), 7.51–7.46 (m, 4H), 7.45–7.41 (m, 1H), 7.37 (d, *J* = 2.5 Hz, 1H), 7.33 (dd, *J* = 8.5, 2.4 Hz, 1H), 7.19 (td, *J* = 7.6, 1.2 Hz, 1H), 7.13 (dt, *J* = 8.2, 1.2 Hz, 1H), 7.02 (d, *J* = 8.5 Hz, 1H). **<sup>13</sup>C NMR** (101 MHz, Chloroform-*d*) δ 170.36 (d, *J* = 122.8 Hz), 161.08 (d, *J* = 6.9 Hz), 151.24, 141.43 (d, *J* = 27.5 Hz), 133.83, 132.17, 132.09, 131.99, 130.94, 130.87, 130.58, 128.39 (d, *J* = 12.2 Hz), 126.32 (d, *J* = 26.6 Hz), 125.40, 122.42, 120.65, 118.10. **<sup>31</sup>P NMR** (162 MHz, Chloroform-*d*) δ 27.13. **MS** (HRMS) *m/z* calcd for C<sub>25</sub>H<sub>18</sub>BrNO<sub>2</sub>P (M+H)<sup>+</sup> = 474.0253, found = 474.0257.

**(7-bromodibenzo[*b, f*][1,4]oxazepin-11-yl)diphenylphosphine oxide 3ea**

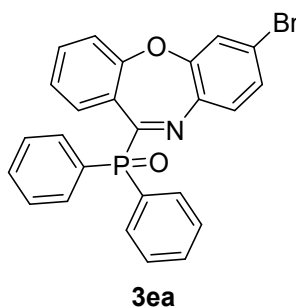

Synthesize according to general procedure. Isolated yield: 27.0 mg, 57% yield.

**<sup>1</sup>H NMR** (400 MHz, Chloroform-*d*) δ 8.16 (dd, *J* = 7.9, 1.6 Hz, 1H), 7.93 (ddt, *J* = 11.8, 6.9, 1.5 Hz, 4H), 7.56–7.51 (m, 2H), 7.47 (ddt, *J* = 7.0, 5.5, 2.4 Hz, 4H), 7.44 (dd, *J* = 7.4, 1.5 Hz, 1H), 7.33 (d, *J* = 2.1 Hz, 1H), 7.28 (dd, *J* = 8.5, 2.2 Hz, 1H), 7.19 (td, *J* = 7.6, 1.2 Hz, 1H), 7.14 (dt, *J* = 8.1, 1.2 Hz, 1H), 7.09 (d, *J* = 8.4 Hz, 1H). **<sup>13</sup>C NMR** (101 MHz, Chloroform-*d*) δ 169.37 (d, *J* = 124.1 Hz), 161.05 (d, *J* = 6.9 Hz), 152.37, 139.57 (d, *J* = 27.7 Hz), 133.91, 132.26, 132.17, 131.19, 130.70, 129.62, 129.13–128.90 (m), 128.50 (d, *J* = 12.3 Hz), 126.55 (d, *J* = 26.8 Hz), 125.66, 124.50, 122.70, 120.89. **<sup>31</sup>P NMR** (162 MHz, Chloroform-*d*) δ 27.28. **MS** (HRMS) *m/z* calcd for C<sub>25</sub>H<sub>18</sub>BrNO<sub>2</sub>P (M+H)<sup>+</sup> = 474.0253, found = 474.0260.

**(7-methyldibenzo[*b, f*][1,4]oxazepin-11-yl)diphenylphosphine oxide 3fa**

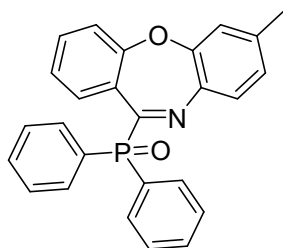

**3fa**

Synthesize according to general procedure. Isolated yield: 24.5 mg, 60% yield.

**<sup>1</sup>H NMR** (400 MHz, Chloroform-*d*)  $\delta$  8.13 (dd,  $J = 7.8, 1.7$  Hz, 1H), 7.98–7.89 (m, 4H), 7.54–7.49 (m, 2H), 7.48–7.42 (m, 4H), 7.40 (dd,  $J = 7.7, 1.7$  Hz, 1H), 7.19–7.09 (m, 3H), 6.95 (d,  $J = 7.0$  Hz, 2H), 2.31 (s, 3H). **<sup>13</sup>C NMR** (101 MHz, Chloroform-*d*)  $\delta$  167.40 (d,  $J = 126.3$  Hz), 161.04 (d,  $J = 7.2$  Hz), 151.62, 140.56, 137.85 (d,  $J = 27.7$  Hz), 133.28, 132.05, 131.96, 131.93 (d,  $J = 103.9$  Hz), 131.74 (d,  $J = 2.8$  Hz), 130.26, 128.25, 128.13, 126.29, 124.97, 121.30, 120.63, 20.90. **<sup>31</sup>P NMR** (162 MHz, Chloroform-*d*)  $\delta$  26.80. **MS** (HRMS)  $m/z$  calcd for C<sub>26</sub>H<sub>21</sub>NO<sub>2</sub>P (M+H)<sup>+</sup> = 410.1304, found = 410.1310.

**(8-methyldibenzo[*b, f*][1,4]oxazepin-11-yl)diphenylphosphine oxide 3ga**

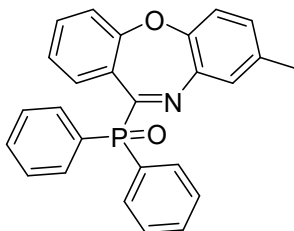

**3ga**

Synthesize according to general procedure. Isolated yield: 23.3 mg, 57% yield.

**<sup>1</sup>H NMR** (400 MHz, Chloroform-*d*)  $\delta$  8.14–8.09 (m, 1H), 8.00–7.90 (m, 4H), 7.56–7.51 (m, 2H), 7.50–7.45 (m, 4H), 7.42 (td,  $J = 7.8, 1.6$  Hz, 1H), 7.19–7.12 (m, 2H), 7.04 (d,  $J = 1.9$  Hz, 3H), 2.28 (s, 3H). **<sup>13</sup>C NMR** (101 MHz, Chloroform-*d*)  $\delta$  167.72, 159.70, 149.82, 148.73, 134.19, 133.37, 132.50 (d,  $J = 2.6$  Hz), 132.01 (d,  $J = 9.2$  Hz), 130.61 (d,  $J = 11.4$  Hz), 128.97–128.71 (m), 128.55, 128.23 (d,  $J = 12.2$  Hz), 126.09, 124.93,



121.70, 121.04, 120.57, 20.60.  $^{31}\text{P}$  NMR (162 MHz, Chloroform-*d*)  $\delta$  26.93. MS (HRMS)  $m/z$  calcd for  $\text{C}_{26}\text{H}_{21}\text{NO}_2\text{P}$  ( $\text{M}+\text{H}$ ) $^+$  = 410.1304, found = 410.1308.

**(8-methoxydibenzo[*b, f*][1,4]oxazepin-11-yl)diphenylphosphine oxide 3ha**

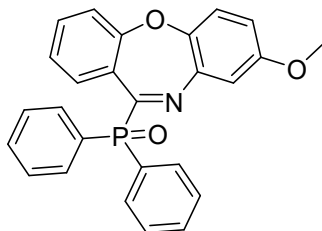

**3ha**

Synthesize according to general procedure. Isolated yield: 19.5 mg, 46% yield.

$^1\text{H}$  NMR (400 MHz, Chloroform-*d*)  $\delta$  8.14–8.09 (m, 1H), 7.95 (ddd,  $J$  = 11.8, 8.2, 1.4 Hz, 4H), 7.53 (td,  $J$  = 7.4, 1.4 Hz, 2H), 7.50–7.45 (m, 4H), 7.42 (td,  $J$  = 7.8, 1.4 Hz, 1H), 7.19–7.12 (m, 2H), 7.07 (d,  $J$  = 8.8 Hz, 1H), 6.78 (dd,  $J$  = 8.8, 3.1 Hz, 1H), 6.73 (d,  $J$  = 3.1 Hz, 1H).  $^{13}\text{C}$  NMR (101 MHz, Chloroform-*d*)  $\delta$  169.89, 161.73, 157.20, 146.08, 140.80, 133.70, 132.43, 132.28, 132.19, 131.39, 130.55, 128.50, 126.63 (d,  $J$  = 26.4 Hz), 125.15, 121.11 (d,  $J$  = 77.4 Hz), 115.43, 112.55, 29.80.  $^{31}\text{P}$  NMR (162 MHz, Chloroform-*d*)  $\delta$  27.19. MS (HRMS)  $m/z$  calcd for  $\text{C}_{26}\text{H}_{21}\text{NO}_3\text{P}$  ( $\text{M}+\text{H}$ ) $^+$  = 426.1254, found = 426.1256.

**(6,8-dimethyldibenzo[*b, f*][1,4]oxazepin-11-yl)diphenylphosphine oxide 3ia**

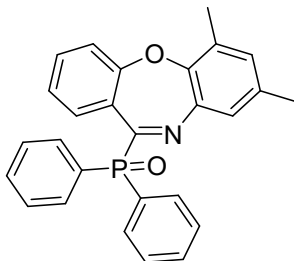

**3ia**

Synthesize according to general procedure. Isolated yield: 25.0 mg, 59% yield.

$^1\text{H}$  NMR (400 MHz, Chloroform-*d*)  $\delta$  8.16 (dd,  $J$  = 7.9, 1.6 Hz, 1H), 8.03–7.92 (m, 4H), 7.54–7.50 (m, 1H), 7.50–7.46 (m, 4H), 7.45 (dt,  $J$  = 3.2, 1.7 Hz, 1H), 7.40 (ddd,  $J$  = 8.1,

7.3, 1.6 Hz, 1H), 7.18 (dt,  $J = 8.2, 1.3$  Hz, 1H), 7.14 (dd,  $J = 7.6, 1.2$  Hz, 1H), 6.90 (dd,  $J = 18.7, 2.2$  Hz, 2H), 2.42 (s, 3H), 2.23 (s, 3H).  $^{13}\text{C}$  NMR (101 MHz, Chloroform-*d*)  $\delta$  167.91 (d,  $J = 125.8$  Hz), 161.30 (d,  $J = 7.1$  Hz), 147.92, 139.99 (d,  $J = 27.3$  Hz), 134.52, 133.06, 132.43, 131.99 (d,  $J = 9.1$  Hz), 131.73 (d,  $J = 2.9$  Hz), 131.59, 131.40, 130.28, 129.75, 128.19 (d,  $J = 12.1$  Hz), 126.02, 124.81, 120.72, 20.39, 16.03.  $^{31}\text{P}$  NMR (162 MHz, Chloroform-*d*)  $\delta$  26.86. MS (HRMS)  $m/z$  calcd for  $\text{C}_{27}\text{H}_{23}\text{NO}_2\text{P}$  ( $\text{M}+\text{H}$ ) $^+$  = 424.1461, found = 424.1465.

**(3-fluorodibenzo[*b, f*][1,4]oxazepin-11-yl)diphenylphosphine oxide 3ja**

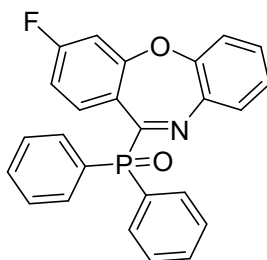

**3ja**

Synthesize according to general procedure. Isolated yield: 27.7 mg, 67% yield.

$^1\text{H}$  NMR (400 MHz, Chloroform-*d*)  $\delta$  8.27–8.20 (m, 1H), 8.00–7.92 (m, 4H), 7.54–7.50 (m, 1H), 7.50–7.45 (m, 4H), 7.44 (dt,  $J = 3.2, 1.7$  Hz, 1H), 7.25–7.19 (m, 2H), 7.15 (dd,  $J = 7.2, 1.8$  Hz, 1H), 7.11 (dd,  $J = 8.3, 1.5$  Hz, 1H), 6.89 (dd,  $J = 6.0, 2.0$  Hz, 1H), 6.88–6.85 (m, 1H).  $^{13}\text{C}$  NMR (101 MHz, Chloroform-*d*)  $\delta$  168.09, 166.84, 164.28, 162.56 (dd,  $J = 11.4, 7.2$  Hz), 151.42, 140.00 (d,  $J = 27.2$  Hz), 131.98, 131.89, 130.94, 129.69, 128.40, 128.23 (d,  $J = 12.3$  Hz), 125.88, 122.91 (dd,  $J = 27.6, 3.5$  Hz), 120.82, 112.39 (d,  $J = 21.5$  Hz), 108.57 (d,  $J = 23.4$  Hz).  $^{31}\text{P}$  NMR (162 MHz, Chloroform-*d*)  $\delta$  27.06. MS (HEMS)  $m/z$  calcd for  $\text{C}_{25}\text{H}_{18}\text{FNO}_2\text{P}$  ( $\text{M}+\text{H}$ ) $^+$  = 414.1054, found = 414.1060.

**(2-fluorodibenzo[*b, f*][1,4]oxazepin-11-yl)diphenylphosphine oxide 3ka**

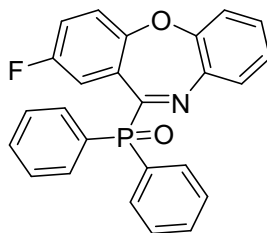

**3ka**

Synthesize according to general procedure. Isolated yield: 30.1 mg, 73% yield.

**<sup>1</sup>H NMR** (400 MHz, Chloroform-*d*)  $\delta$  7.96 (ddt,  $J = 11.8, 6.9, 1.5$  Hz, 5H), 7.56–7.52 (m, 1H), 7.52–7.47 (m, 4H), 7.46 (dt,  $J = 3.2, 1.7$  Hz, 1H), 7.28–7.22 (m, 2H), 7.19–7.13 (m, 2H), 7.11 (dd,  $J = 6.5, 2.0$  Hz, 2H). **<sup>13</sup>C NMR** (101 MHz, Chloroform-*d*)  $\delta$  167.16 (d,  $J = 125.1$  Hz), 160.10, 157.66, 157.09 (d,  $J = 6.9$  Hz), 151.76, 139.93 (d,  $J = 26.6$  Hz), 131.93, 131.78, 130.74, 130.67–129.64 (m), 128.27, 127.25 (dd,  $J = 27.1, 8.1$  Hz), 126.17–125.10 (m), 122.38–121.34 (m), 121.13–120.46 (m), 120.45–119.77 (m), 117.28–116.12 (m). **<sup>31</sup>P NMR** (162 MHz, Chloroform-*d*)  $\delta$  27.09. **MS** (HRMS)  $m/z$  calcd for C<sub>25</sub>H<sub>18</sub>FNO<sub>2</sub>P (M+H)<sup>+</sup> = 414.1054, found = 414.1057.

**(2-chlorodibenzo[*b, f*][1, 4]oxazepin-11-yl)diphenylphosphine oxide 3la**

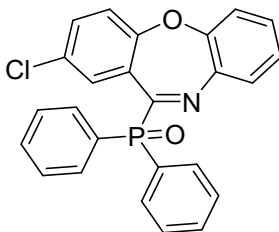

**3la**

Synthesize according to general procedure. Isolated yield: 22.7 mg, 53% yield.

**<sup>1</sup>H NMR** (400 MHz, Chloroform-*d*)  $\delta$  8.19 (dd,  $J = 2.5, 0.6$  Hz, 1H), 7.98–7.92 (m, 4H), 7.57–7.52 (m, 2H), 7.51–7.45 (m, 4H), 7.38 (dd,  $J = 8.7, 2.5$  Hz, 1H), 7.27 (d,  $J = 6.6$  Hz, 1H), 7.24 (d,  $J = 1.9$  Hz, 1H), 7.22 (d,  $J = 1.9$  Hz, 1H), 7.20–7.16 (m, 1H), 7.15–7.12 (m, 1H), 7.09 (dd,  $J = 8.7, 1.2$  Hz, 1H). **<sup>13</sup>C NMR** (101 MHz, Chloroform-*d*)  $\delta$  167.52 (d,  $J = 124.7$  Hz), 159.90 (d,  $J = 7.0$  Hz), 151.87, 140.21 (d,  $J = 26.5$  Hz), 133.52, 132.30, 132.21, 131.11, 130.81, 130.17 (d,  $J = 8.6$  Hz), 128.71, 128.59, 128.47, 127.74 (d,  $J =$

27.1 Hz), 126.06, 122.13, 120.98.  $^{31}\text{P}$  NMR (162 MHz, Chloroform-*d*)  $\delta$  26.73. MS (HRMS)  $m/z$  calcd for  $\text{C}_{25}\text{H}_{18}\text{ClNO}_2\text{P}$  ( $\text{M}+\text{H}$ ) $^+$  = 430.0758, found = 430.0767.

**(2-bromodibenzo[*b, f*][1, 4]oxazepin-11-yl)diphenylphosphine oxide 3ma**

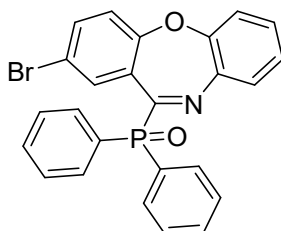

**3ma**

Synthesize according to general procedure. Isolated yield: 30.0 mg, 63% yield.

$^1\text{H}$  NMR (400 MHz, Chloroform-*d*)  $\delta$  8.35 (dd,  $J = 2.4, 0.6$  Hz, 1H), 8.00–7.92 (m, 4H), 7.53–7.50 (m, 2H), 7.50–7.46 (m, 4H), 7.45 (dt,  $J = 3.2, 1.7$  Hz, 1H), 7.24–7.22 (m, 1H), 7.21 (d,  $J = 1.0$  Hz, 1H), 7.17–7.14 (m, 1H), 7.14–7.10 (m, 1H), 7.01 (dd,  $J = 8.7, 1.3$  Hz, 1H).  $^{13}\text{C}$  NMR (101 MHz, Chloroform-*d*)  $\delta$  167.15 (d,  $J = 124.8$  Hz), 160.16 (d,  $J = 6.8$  Hz), 151.53, 139.91 (d,  $J = 26.5$  Hz), 136.25 (d,  $J = 5.2$  Hz), 132.83 (d,  $J = 6.5$  Hz), 132.03, 131.95, 131.87, 130.83, 129.92, 128.30 (d,  $J = 12.0$  Hz), 127.90 (d,  $J = 27.2$  Hz), 125.85, 122.29 (d,  $J = 6.7$  Hz), 120.75, 118.02.  $^{31}\text{P}$  NMR (162 MHz, Chloroform-*d*)  $\delta$  27.06. MS (HRMS)  $m/z$  calcd for  $\text{C}_{25}\text{H}_{18}\text{BrNO}_2\text{P}$  ( $\text{M}+\text{H}$ ) $^+$  = 474.0253, found = 474.0261.

**Dibenzo[*b, f*][1,4]oxazepin-11-ylbis(4-fluorophenyl)phosphine oxide 3ab**

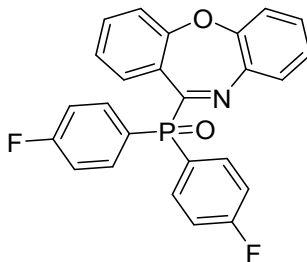

**3ab**

Synthesize according to general procedure. Isolated yield: 22.4 mg, 52% yield.

$^1\text{H}$  NMR (400 MHz, Chloroform-*d*)  $\delta$  8.14 (dd,  $J = 7.8, 1.6$  Hz, 1H), 7.95 (tdd,  $J = 8.7, 5.5, 2.0$  Hz, 4H), 7.46 (td,  $J = 7.7, 1.6$  Hz, 1H), 7.29–7.26 (m, 1H), 7.25 (dd,  $J = 3.2, 2.1$

Hz, 1H), 7.23–7.21 (m, 1H), 7.19 (d,  $J = 0.7$  Hz, 1H), 7.19–7.17 (m, 3H), 7.16 (dd,  $J = 2.6, 1.9$  Hz, 2H).  $^{13}\text{C}$  NMR (101 MHz, Chloroform-*d*)  $\delta$  168.24 (d,  $J = 127.3$  Hz), 165.15 (dd,  $J = 253.8, 3.4$  Hz), 161.31 (d,  $J = 7.3$  Hz), 152.02, 142.69, 140.17 (d,  $J = 27.9$  Hz), 134.57 (dd,  $J = 10.6, 8.9$  Hz), 133.77, 130.12 (d,  $J = 32.8$  Hz), 129.47, 128.42, 127.55 (dd,  $J = 107.7, 3.4$  Hz), 126.49 (d,  $J = 7.8$  Hz), 125.76, 125.23, 120.94 (d,  $J = 24.1$  Hz), 115.82 (dd,  $J = 21.4, 13.3$  Hz).  $^{31}\text{P}$  NMR (162 MHz, Chloroform-*d*)  $\delta$  25.37. MS (HRMS)  $m/z$  calcd for  $\text{C}_{25}\text{H}_{17}\text{F}_2\text{NO}_2\text{P}$  ( $\text{M}+\text{H}$ ) $^+ = 432.0959$ , found = 432.0963.

**bis(4-chlorophenyl)(dibenzo[*b, f*][1,4]oxazepin-11-yl)phosphine oxide 3ac**

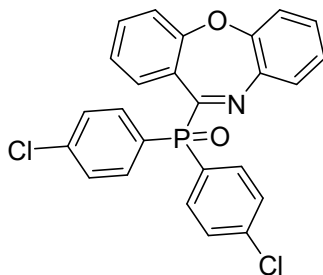

**3ac**

Synthesize according to general procedure. Isolated yield: 25.0 mg, 54% yield.

$^1\text{H}$  NMR (400 MHz, Chloroform-*d*)  $\delta$  8.13 (dd,  $J = 7.8, 1.6$  Hz, 1H), 7.91–7.84 (m, 4H), 7.48–7.43 (m, 5H), 7.28 (dd,  $J = 7.2, 1.6$  Hz, 1H), 7.24 (t,  $J = 2.0$  Hz, 1H), 7.23–7.20 (m, 1H), 7.19 (dd,  $J = 1.5, 0.7$  Hz, 1H), 7.18–7.17 (m, 1H), 7.16 (dd,  $J = 2.4, 1.3$  Hz, 1H).  $^{13}\text{C}$  NMR (101 MHz, Chloroform-*d*)  $\delta$  168.67, 167.40, 161.47 (d,  $J = 7.3$  Hz), 152.17, 140.27 (d,  $J = 27.9$  Hz), 138.96 (d,  $J = 3.6$  Hz), 134.01, 133.64, 133.54, 130.69, 130.34 (d,  $J = 6.8$  Hz), 129.64, 128.98 (d,  $J = 7.2$  Hz), 126.40 (d,  $J = 27.9$  Hz), Unknown NMR (162 MHz, Chloroform-*d*)  $\delta$  25.26. 125.90, 125.43 (d,  $J = 14.3$  Hz), 121.14 (t,  $J = 18.7$  Hz).  $^{31}\text{P}$  NMR (162 MHz, Chloroform-*d*)  $\delta$  25.26. MS (HRMS)  $m/z$  calcd for  $\text{C}_{25}\text{H}_{17}\text{Cl}_2\text{NO}_2\text{P}$  ( $\text{M}+\text{H}$ ) $^+ = 464.0368$ , found = 464.0371.

**Dibenzo[*b, f*][1,4]oxazepin-11-yl-di-p-tolylphosphine oxide 3ad**

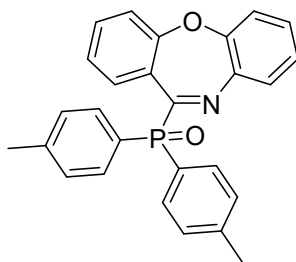

**3ad**

Synthesize according to general procedure. Isolated yield: 34.7 mg, 82% yield.

**<sup>1</sup>H NMR** (400 MHz, Chloroform-*d*)  $\delta$  8.16 (dd,  $J = 8.1, 1.7$  Hz, 1H), 7.89–7.82 (m, 4H), 7.38 (td,  $J = 7.7, 1.7$  Hz, 1H), 7.26 (dd,  $J = 5.1, 3.0$  Hz, 4H), 7.24 (d,  $J = 1.8$  Hz, 1H), 7.20 (ddd,  $J = 8.5, 7.0, 1.8$  Hz, 1H), 7.16–7.13 (m, 2H), 7.12 (q,  $J = 2.0, 1.6$  Hz, 2H), 2.34 (s, 6H). **<sup>13</sup>C NMR** (101 MHz, Chloroform-*d*)  $\delta$  169.21 (d,  $J = 124.6$  Hz), 161.46 (d,  $J = 7.1$  Hz), 152.21, 142.50 (d,  $J = 2.8$  Hz), 140.58 (d,  $J = 27.1$  Hz), 133.62 (d,  $J = 18.0$  Hz), 132.30, 132.21, 130.59 (d,  $J = 23.1$  Hz), 129.46, 129.39, 129.34, 129.18, 129.05, 126.76 (d,  $J = 27.0$  Hz), 126.06–124.86 (m), 121.42–120.50 (m), 21.74 (d,  $J = 11.4$  Hz). **<sup>31</sup>P NMR** (162 MHz, Chloroform-*d*)  $\delta$  27.64. **MS** (HRMS)  $m/z$  calcd for C<sub>27</sub>H<sub>23</sub>NO<sub>2</sub>P (M+H)<sup>+</sup> = 424.1461, found = 424.1467.

**Dibenzo[*b, f*][1, 4]oxazepin-11-ylbis(4-methoxyphenyl)phosphine oxide 3ae**

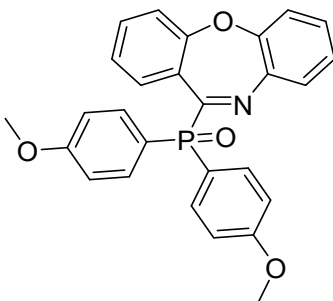

**3ae**

Synthesize according to general procedure. Isolated yield: 21.4 mg, 47% yield.

**<sup>1</sup>H NMR** (400 MHz, Chloroform-*d*)  $\delta$  8.13 (dd,  $J = 7.8, 1.7$  Hz, 1H), 7.85 (tt,  $J = 9.7, 2.4$  Hz, 4H), 7.42 (td,  $J = 7.7, 1.6$  Hz, 1H), 7.26–7.23 (m, 1H), 7.22–7.18 (m, 1H), 7.17–7.13 (m, 4H), 6.99–6.95 (m, 4H), 3.82 (s, 6H). **<sup>13</sup>C NMR** (101 MHz, Chloroform-*d*)  $\delta$  162.38,

161.28, 152.04, 133.96, 133.92, 130.46 (d,  $J = 20.5$  Hz), 129.52, 128.48, 125.36, 123.77, 122.67, 120.81, 114.02, 113.83, 113.71, 55.27.  $^{31}\text{P}$  NMR (162 MHz, Chloroform- $d$ )  $\delta$  27.39. MS (HRMS)  $m/z$  calcd for  $\text{C}_{27}\text{H}_{23}\text{NO}_4\text{P}$  ( $\text{M}+\text{H}$ ) $^+ = 456.1359$ , found = 456.1365.

**dibenzo[*b, f*][1, 4]oxazepin-11-ylbis(3,5-dimethylphenyl)phosphine oxide 3af**

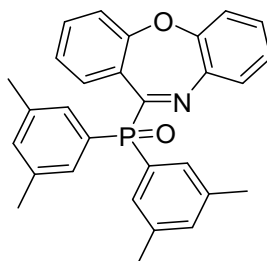

**3af**

Synthesize according to general procedure. Isolated yield: 24.4 mg, 54% yield.

$^1\text{H}$  NMR (400 MHz, Chloroform- $d$ )  $\delta$  8.12 (dd,  $J = 8.2, 1.6$  Hz, 1H), 7.56 (dd,  $J = 12.1, 1.7$  Hz, 4H), 7.45–7.38 (m, 1H), 7.28–7.21 (m, 2H), 7.18 (t,  $J = 1.5$  Hz, 1H), 7.17 (t,  $J = 1.8$  Hz, 2H), 7.14 (q,  $J = 1.5$  Hz, 3H), 2.34 (s, 12H).  $^{13}\text{C}$  NMR (101 MHz, Chloroform- $d$ )  $\delta$  169.60, 168.37, 161.32 (d,  $J = 7.0$  Hz), 152.08, 140.49 (d,  $J = 27.3$  Hz), 137.91, 137.79, 134.14–133.56 (m), 133.45 (d,  $J = 2.8$  Hz), 132.05, 131.02, 130.89–130.03 (m), 129.64, 129.55, 128.06 (d,  $J = 29.6$  Hz), 126.57 (d,  $J = 26.8$  Hz), 120.73 (dt,  $J = 63.0, 31.0$  Hz), 21.30.  $^{31}\text{P}$  NMR (162 MHz, Chloroform- $d$ )  $\delta$  27.93. MS (HRMS)  $m/z$  calcd for  $\text{C}_{29}\text{H}_{27}\text{NO}_4\text{P}$  ( $\text{M}+\text{H}$ ) $^+ = 452.1774$ , found = 452.1783.

**(10,11-dihydrodibenzo[*b, f*][1,4]oxazepin-11-yl)diphenylphosphine oxide B**

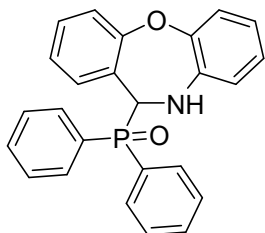

**B**

Light yellow solid;  $^1\text{H NMR}$  (400 MHz,  $\text{CDCl}_3$ )  $\delta$  7.84 – 7.77 (m, 2H), 7.51 (dddd,  $J = 11.1, 8.5, 6.4, 1.4$  Hz, 3H), 7.46 – 7.39 (m, 3H), 7.30 (tdd,  $J = 8.2, 3.1, 1.3$  Hz, 2H), 7.21 (ddt,  $J = 8.6, 7.3, 1.5$  Hz, 1H), 7.09 (dt,  $J = 8.1, 1.0$  Hz, 1H), 7.04 (dt,  $J = 7.7, 1.7$  Hz, 1H), 6.89 (dd,  $J = 7.6, 1.3$  Hz, 1H), 6.84 (ddd,  $J = 7.9, 7.1, 1.5$  Hz, 1H), 6.77 (ddd,  $J = 21.2, 8.0, 1.5$  Hz, 2H), 6.66 (ddd,  $J = 8.0, 7.1, 1.6$  Hz, 1H), 5.40 (d,  $J = 11.7$  Hz, 1H), 4.59 (s, 1H).  $^{13}\text{C NMR}$  (101 MHz,  $\text{CDCl}_3$ )  $\delta$  157.03 (d,  $J = 6.3$  Hz), 146.50, 136.73 (d,  $J = 5.9$  Hz), 132.20 (d,  $J = 2.8$  Hz), 131.94, 131.85, 130.21 (d,  $J = 5.0$  Hz), 129.69, 128.55 (d,  $J = 11.5$  Hz), 128.34 (d,  $J = 11.5$  Hz), 124.81, 124.42, 123.47, 120.93, 60.28 (d,  $J = 73.0$  Hz).  $^{31}\text{P NMR}$  (162 MHz,  $\text{CDCl}_3$ )  $\delta$  29.97. **HRMS** (ESI)  $m/z$  calcd for  $\text{C}_{25}\text{H}_{21}\text{NO}_2\text{P}$  ( $\text{M}+\text{H}$ ) $^+ = 398.1310$ , found 398.1308.



## 7. <sup>1</sup>H NMR, <sup>13</sup>C NMR and <sup>31</sup>P NMR Spectra

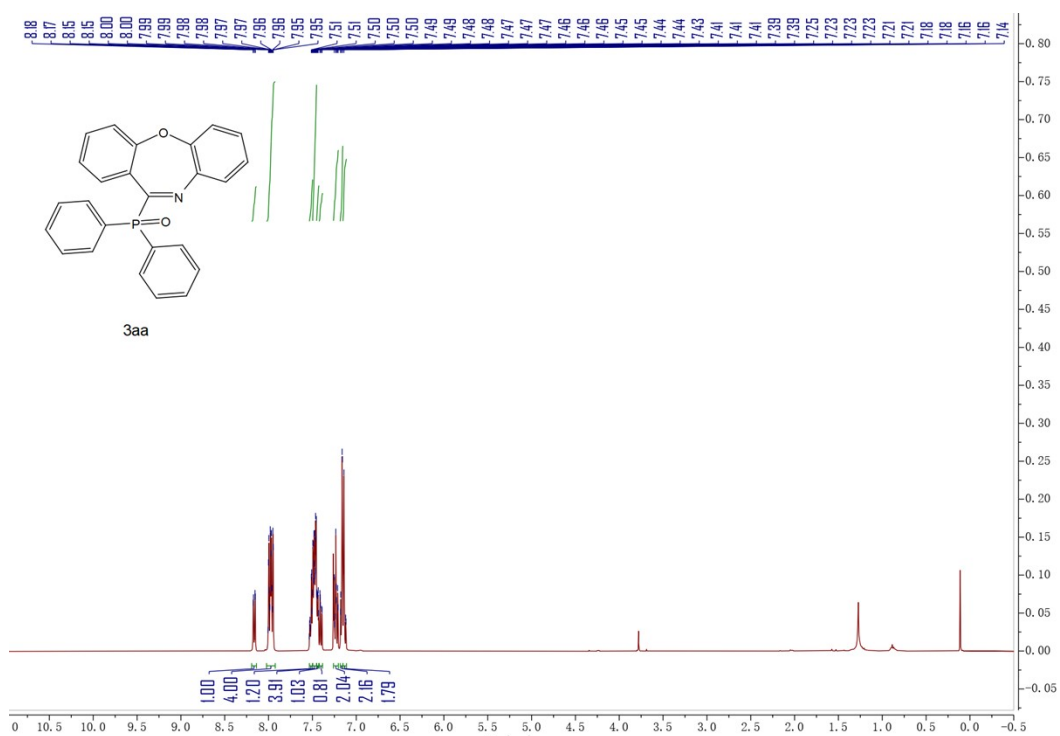

<sup>1</sup>H NMR spectrum of 3aa (CDCl<sub>3</sub>, 400 MHz)

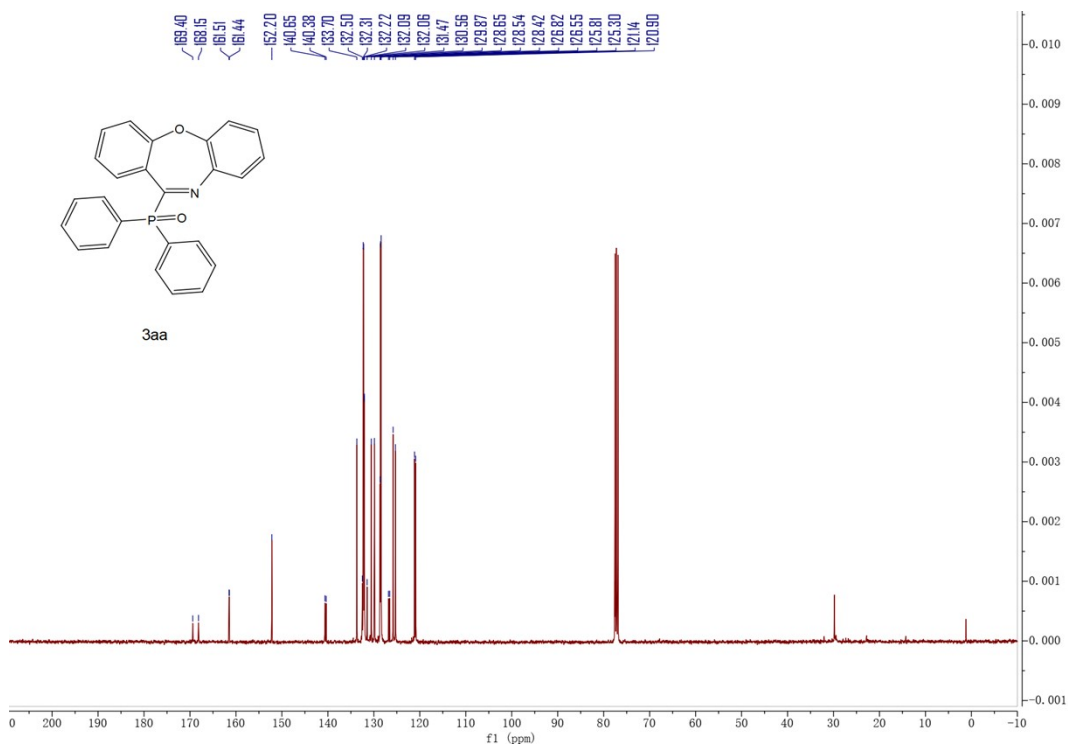

<sup>13</sup>C NMR spectrum of 3aa (CDCl<sub>3</sub>, 101 MHz)



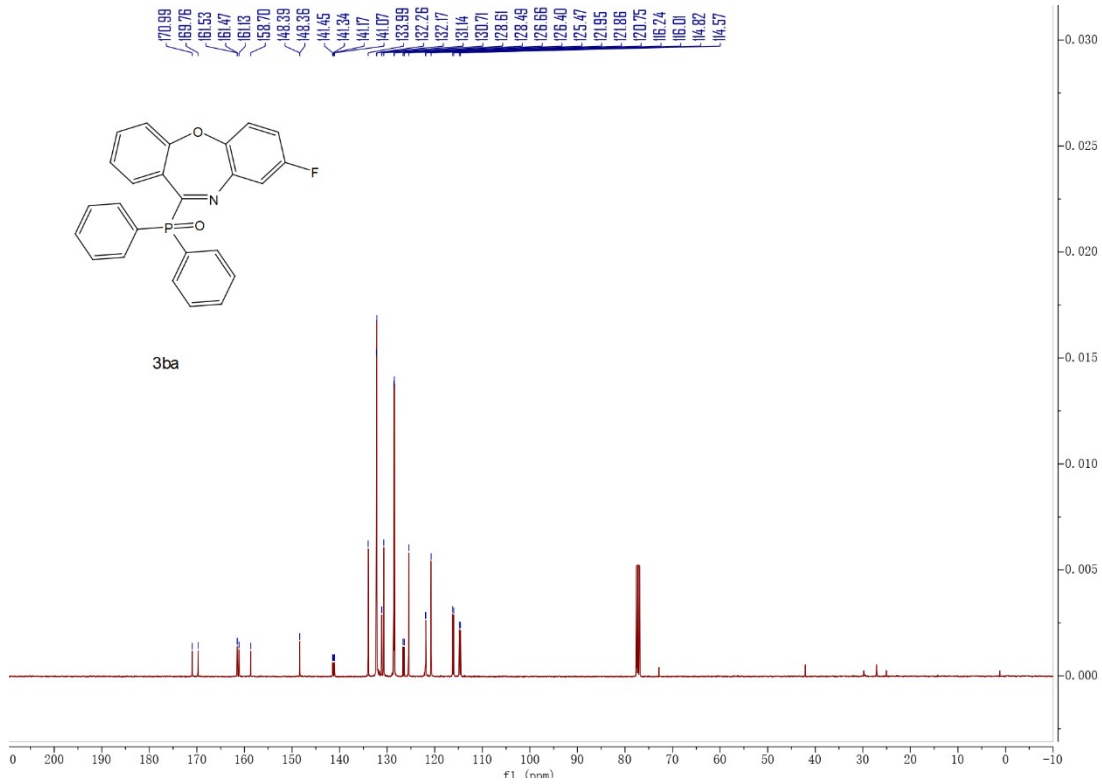

<sup>13</sup>C NMR spectrum of 3ba (CDCl<sub>3</sub>, 101 MHz)

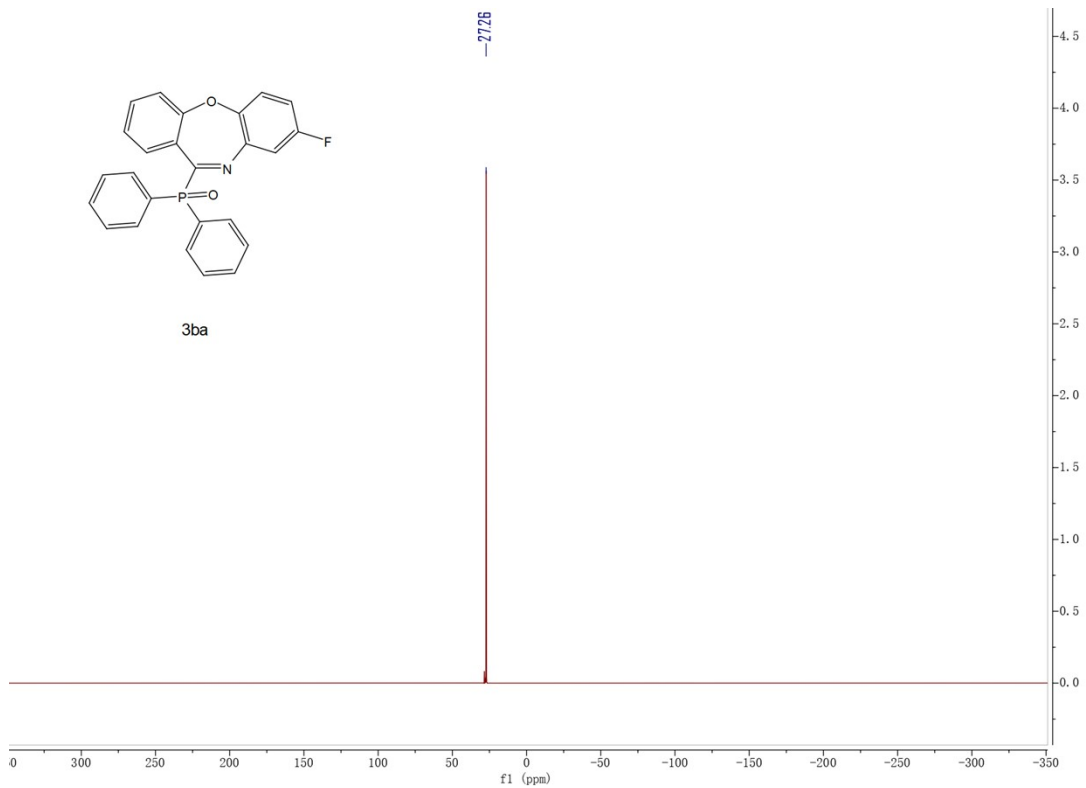

<sup>31</sup>P NMR spectrum of 3ba (CDCl<sub>3</sub>, 162 MHz)

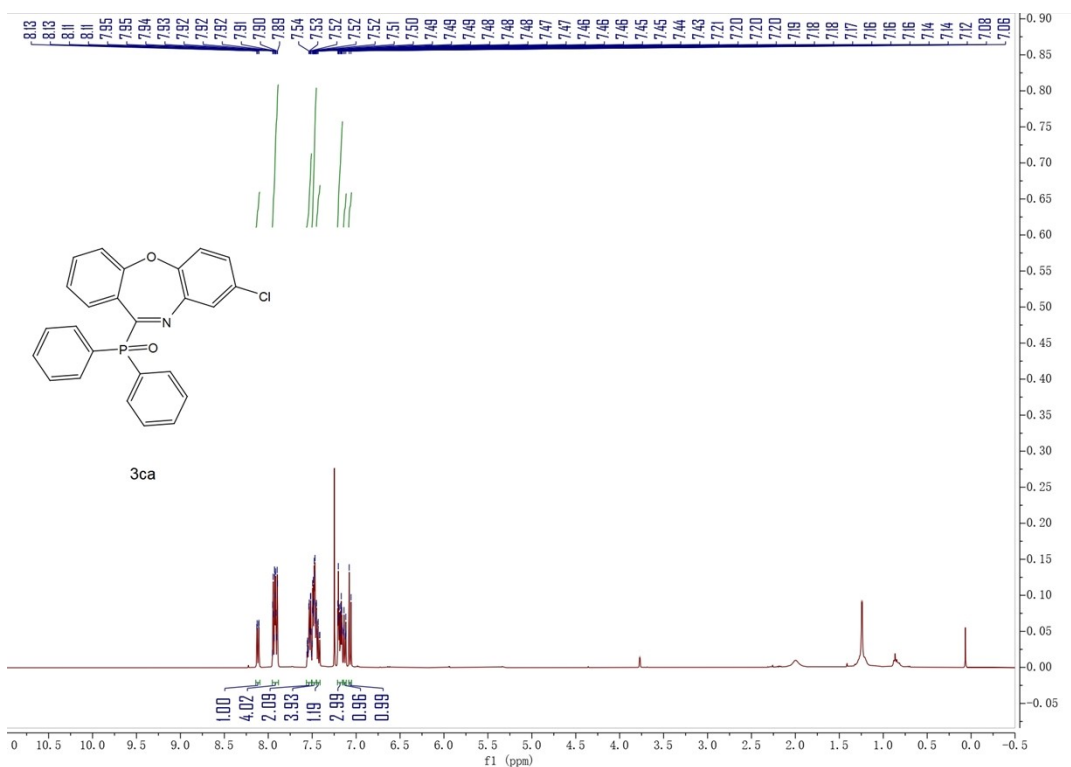

<sup>1</sup>H NMR spectrum of 3ca (CDCl<sub>3</sub>, 400 MHz)

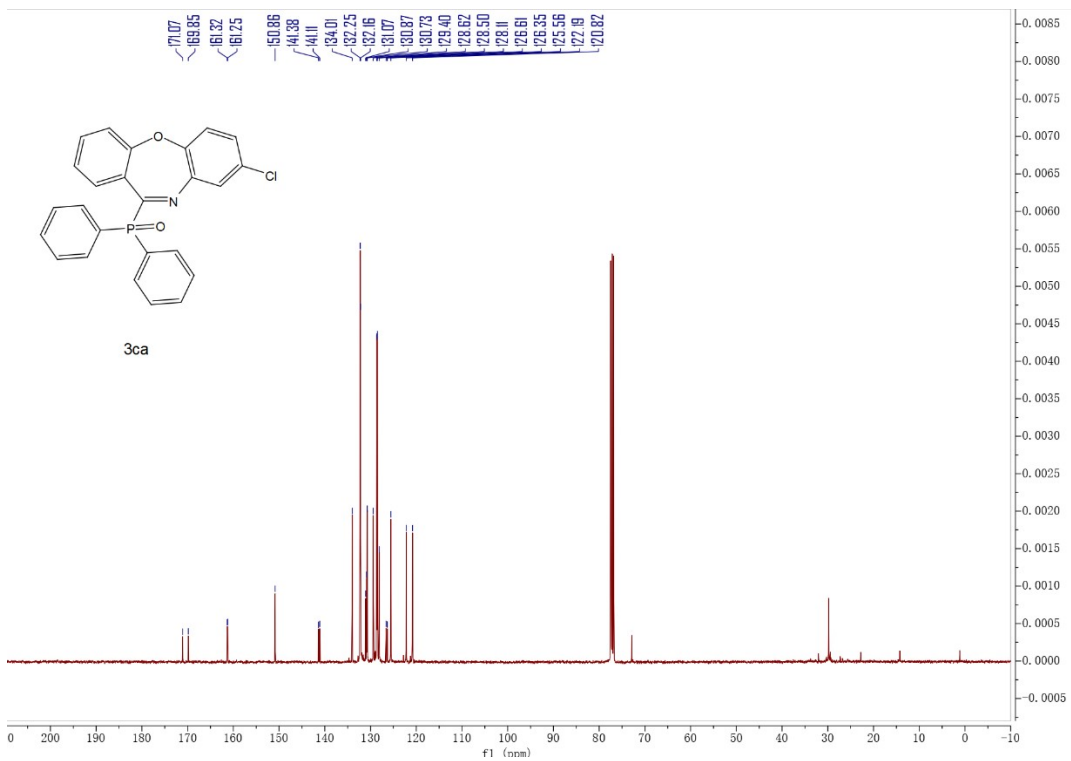

<sup>13</sup>C NMR spectrum of 3ca (CDCl<sub>3</sub>, 101 MHz)

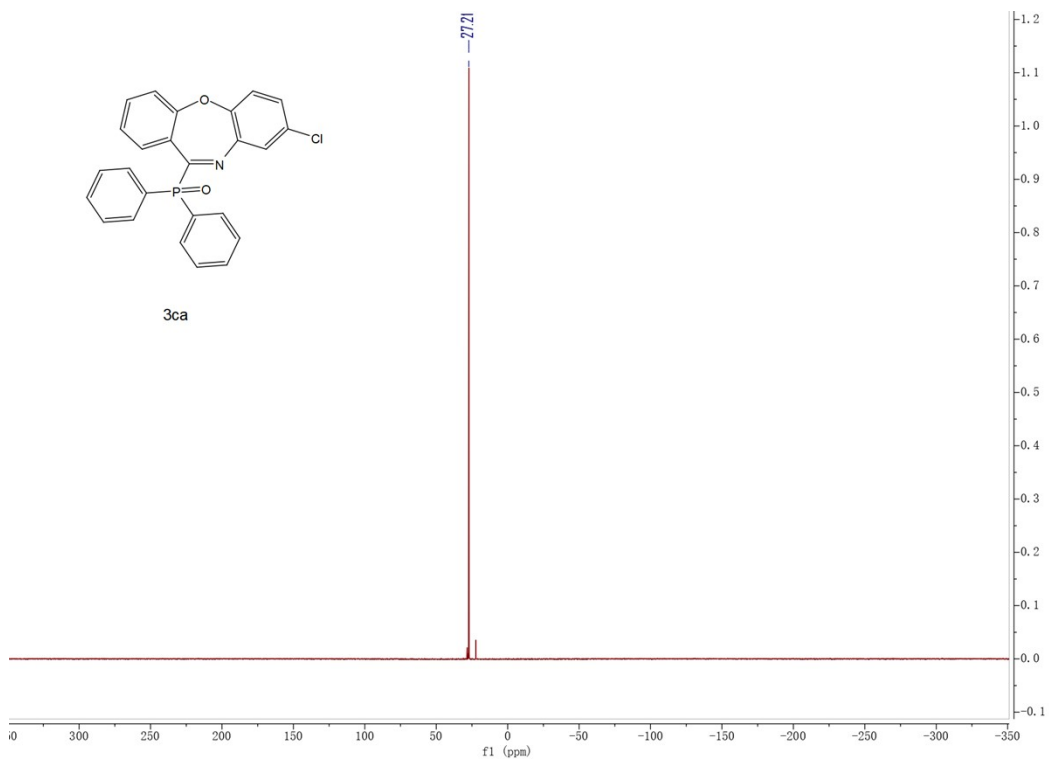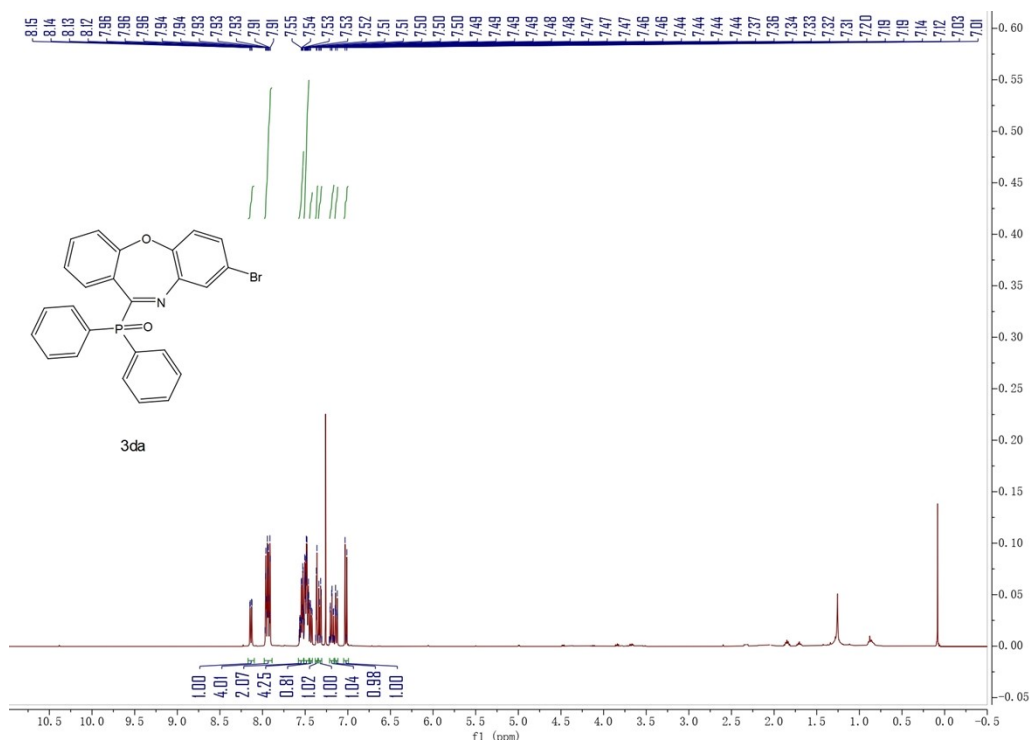

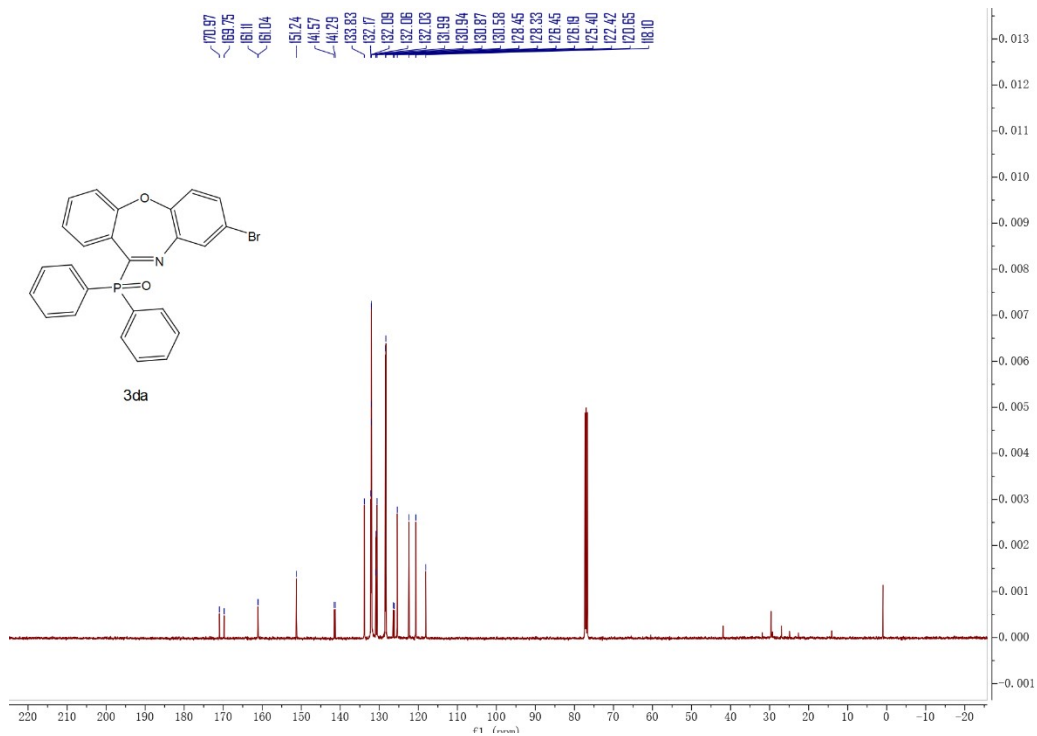

<sup>13</sup>C NMR spectrum of 3da (CDCl<sub>3</sub>, 101 MHz)

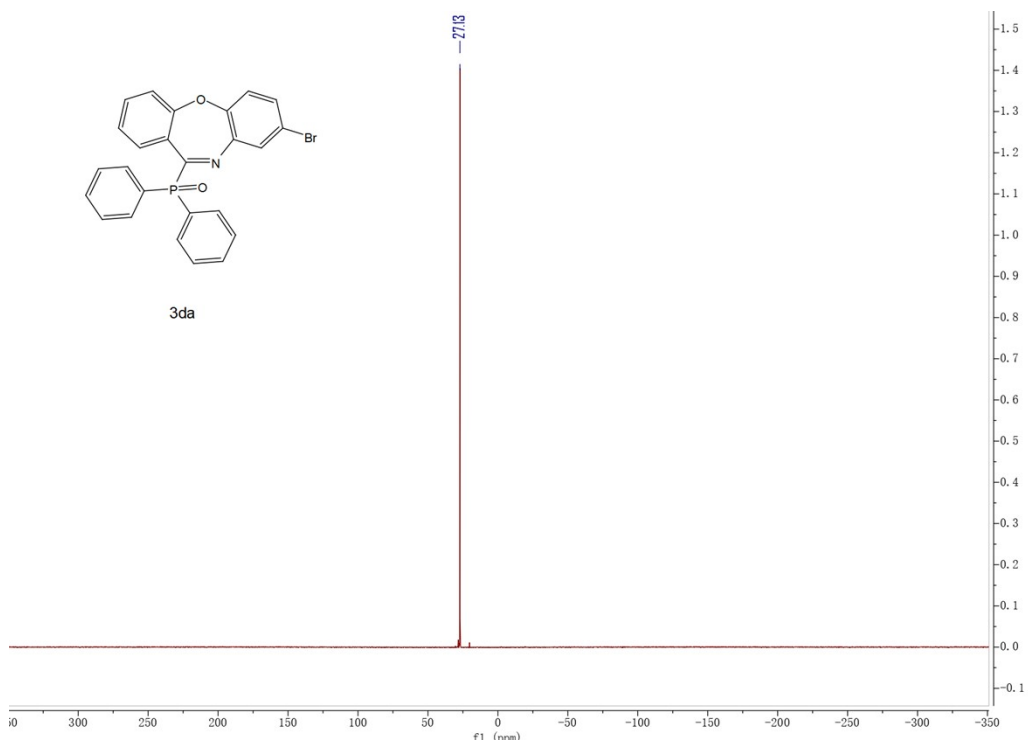

<sup>31</sup>P NMR spectrum of 3da (CDCl<sub>3</sub>, 162 MHz)

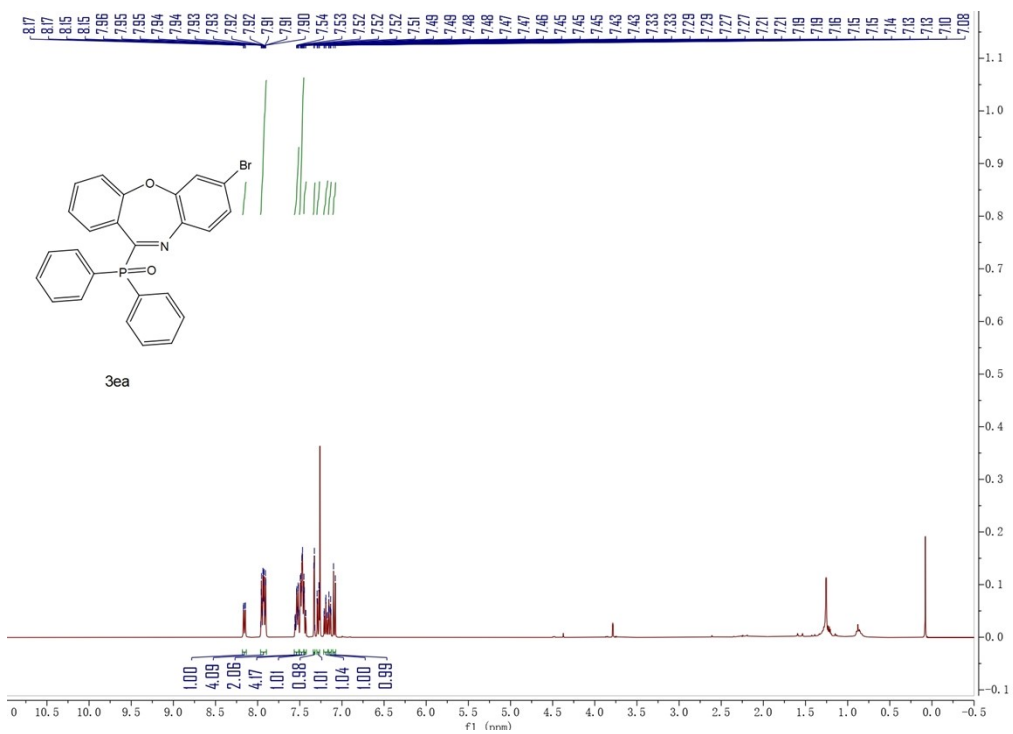

<sup>1</sup>H NMR spectrum of 3ea (CDCl<sub>3</sub>, 400 MHz)

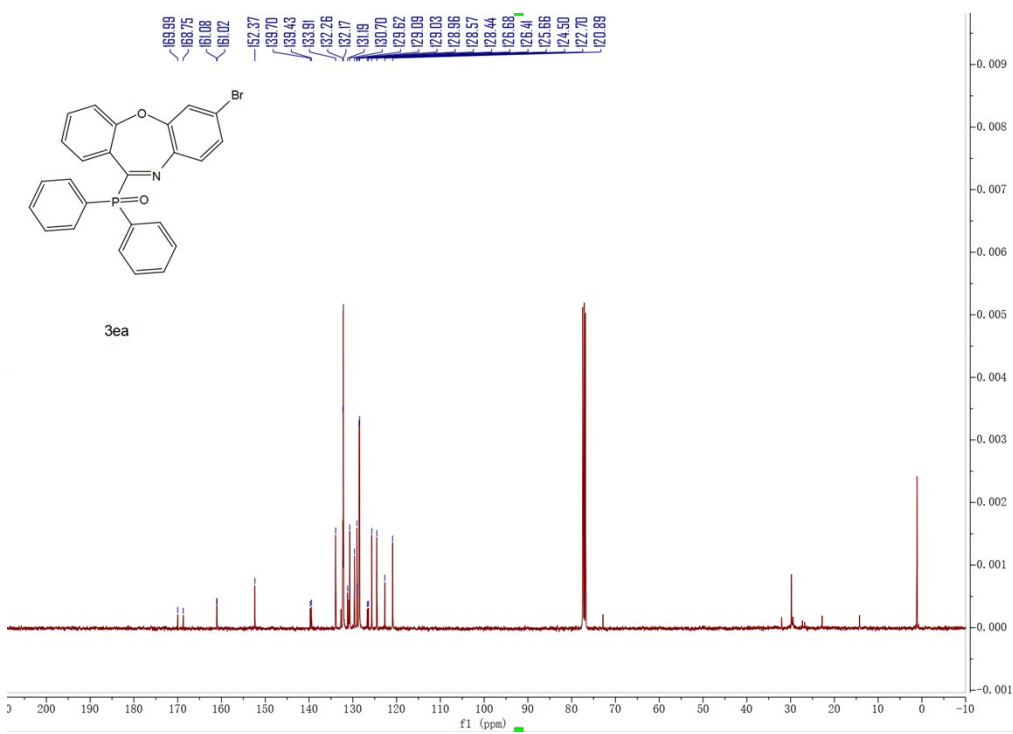

<sup>13</sup>C NMR spectrum of 3ea (CDCl<sub>3</sub>, 101 MHz)

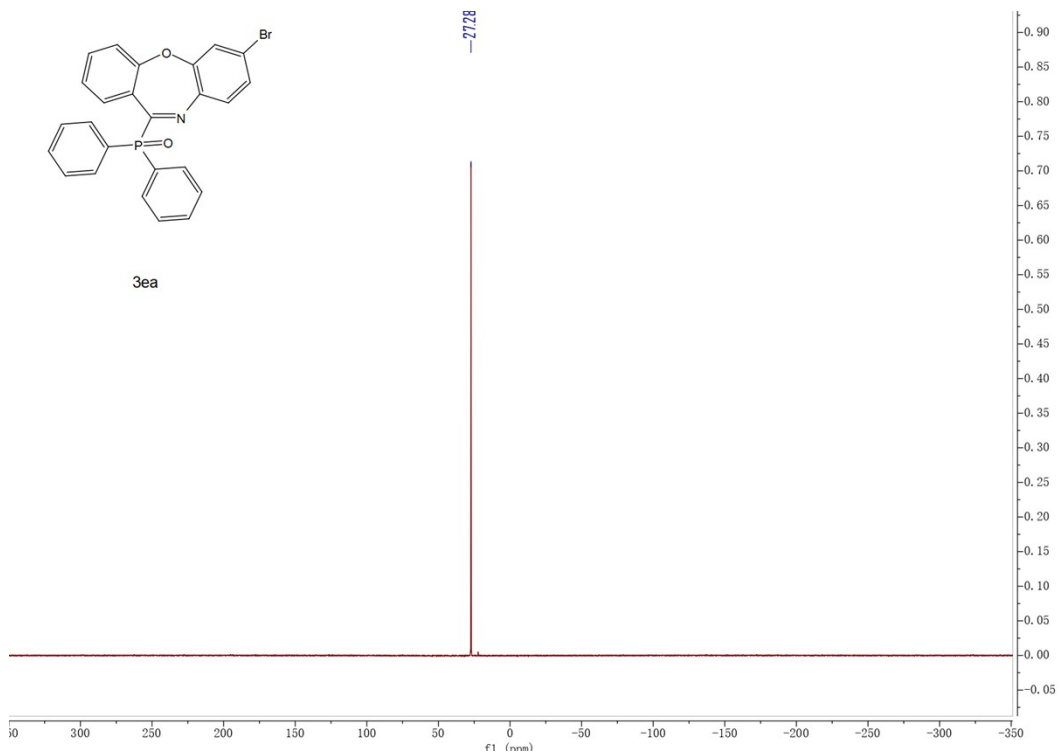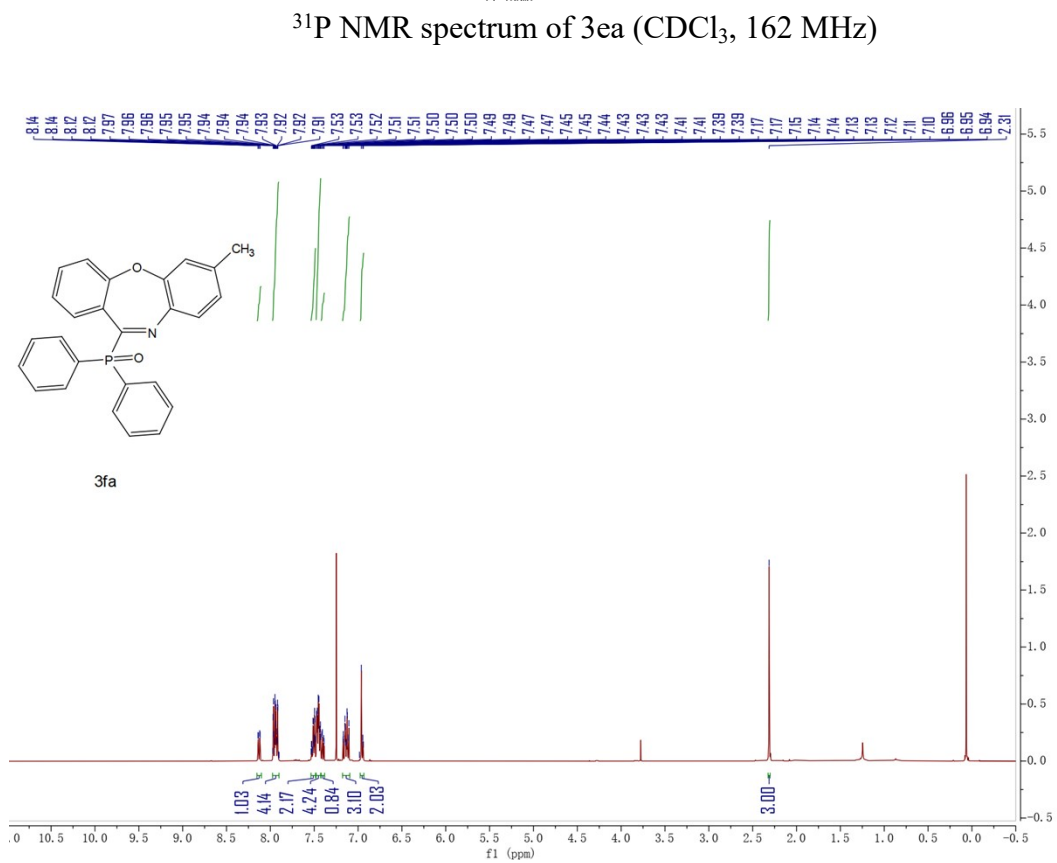

<sup>1</sup>H NMR spectrum of **3fa** (CDCl<sub>3</sub>, 400 MHz)



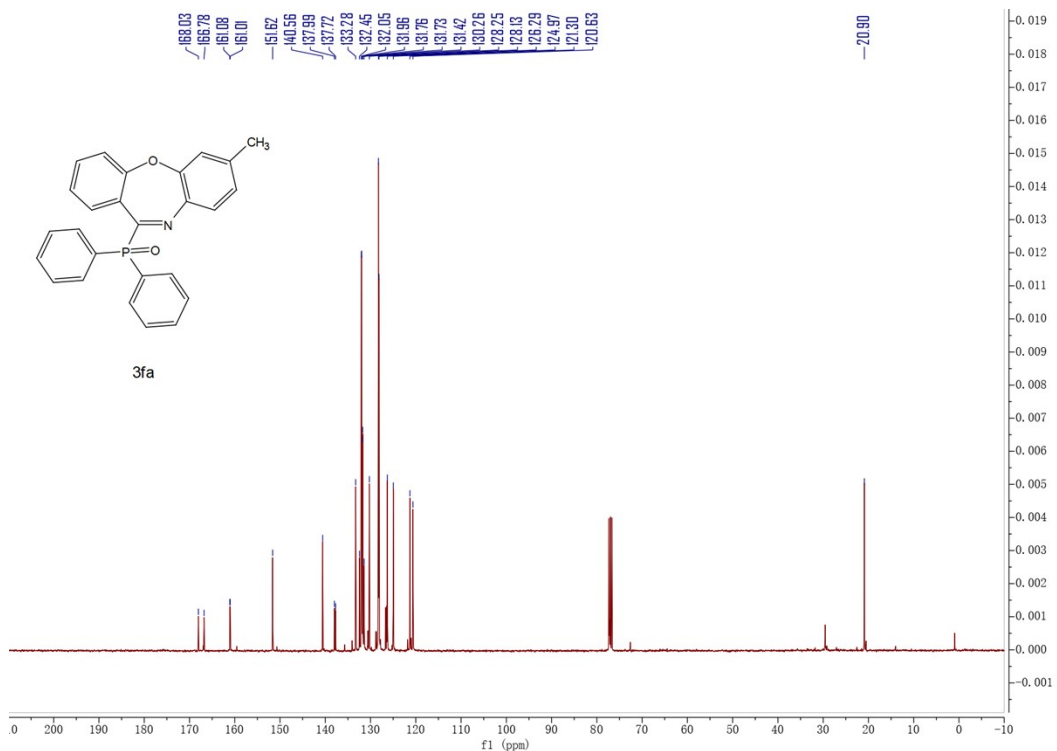

<sup>13</sup>C NMR spectrum of 3fa (CDCl<sub>3</sub>, 101 MHz)

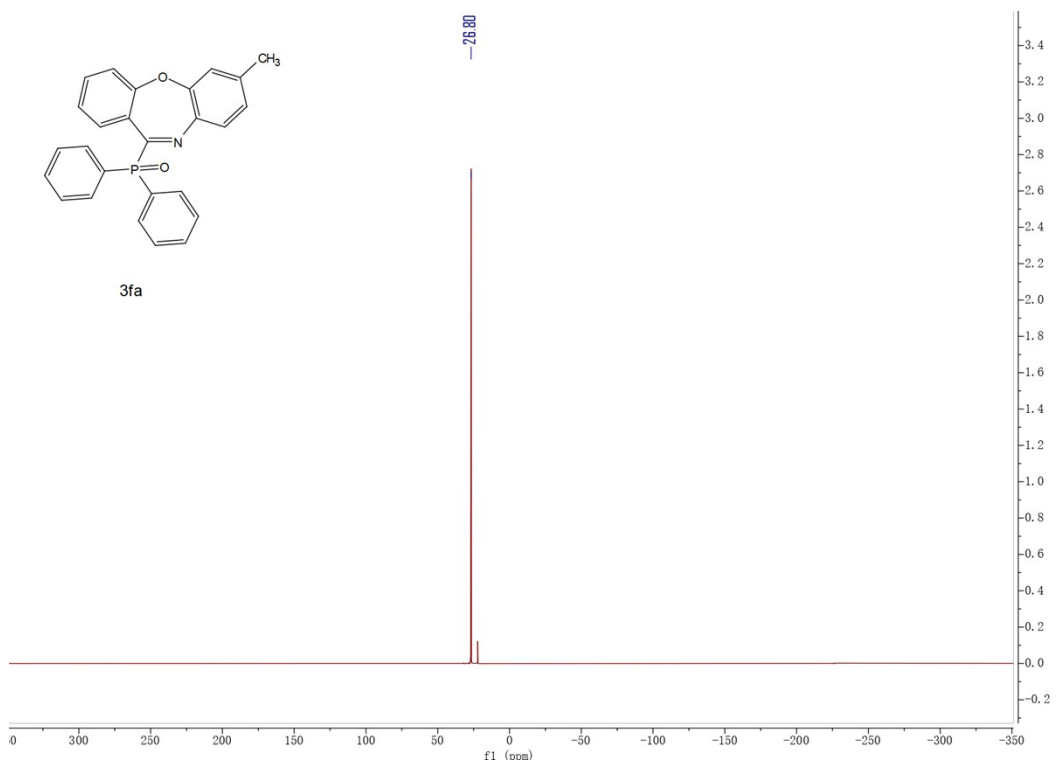

<sup>31</sup>P NMR spectrum of 3fa (CDCl<sub>3</sub>, 162 MHz)



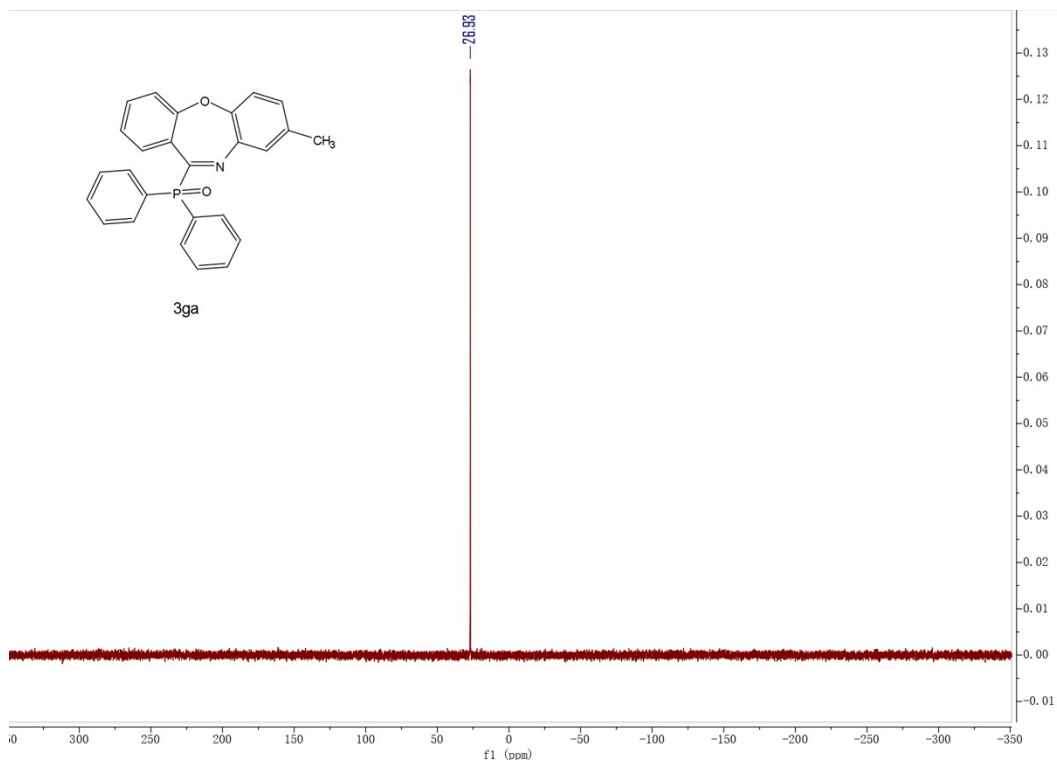

<sup>31</sup>P NMR spectrum of 3ga (CDCl<sub>3</sub>, 162 MHz)

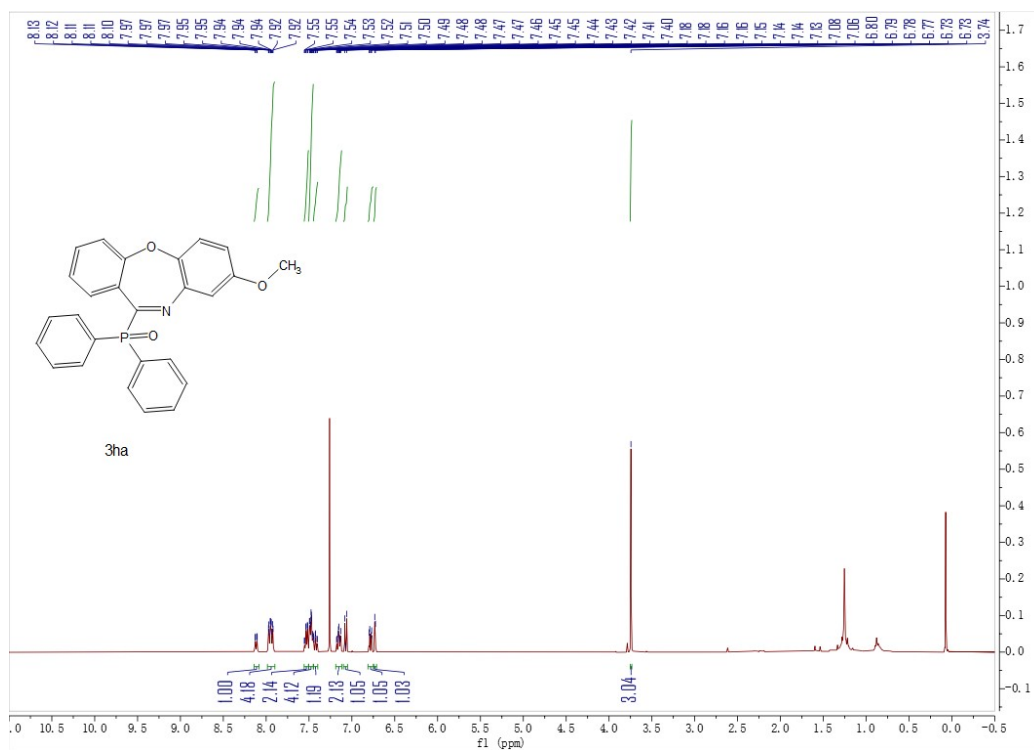

<sup>1</sup>H NMR spectrum of 3ha (CDCl<sub>3</sub>, 400 MHz)

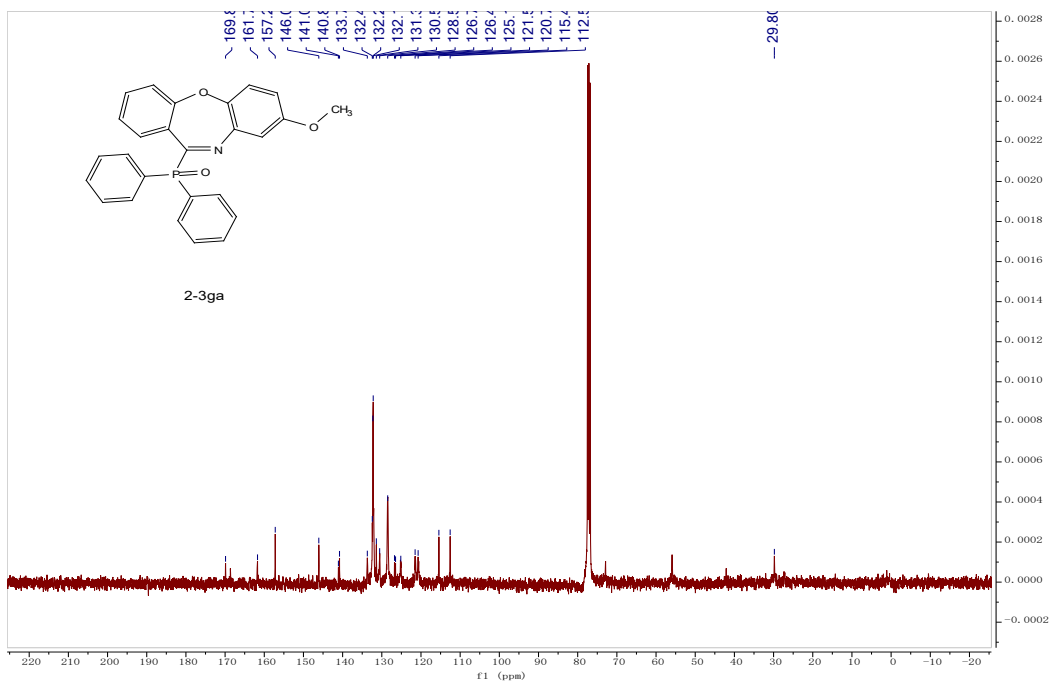

<sup>13</sup>C NMR spectrum of 3ha (CDCl<sub>3</sub>, 101 MHz)

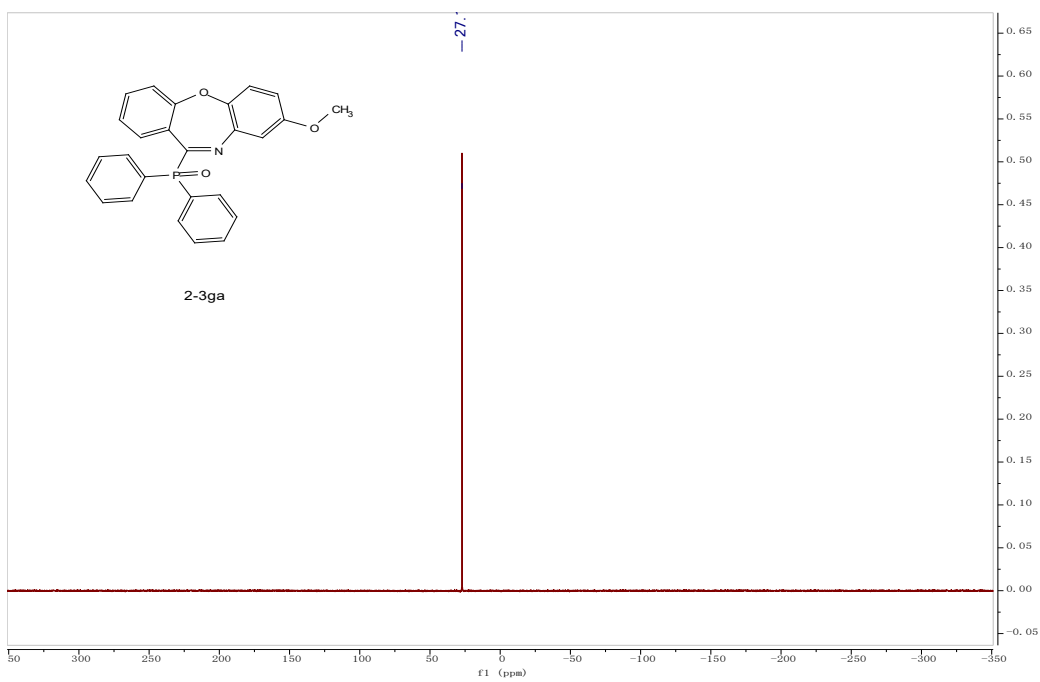

<sup>31</sup>P NMR spectrum of 3ha (CDCl<sub>3</sub>, 162 MHz)

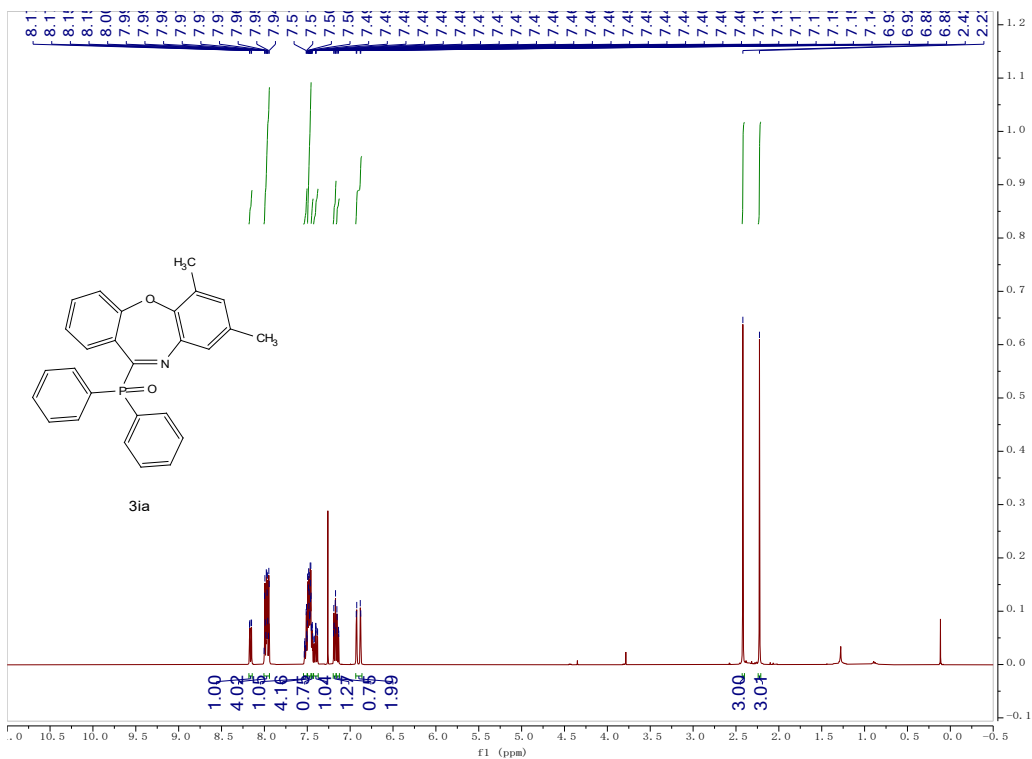

<sup>1</sup>H NMR spectrum of 3ia (CDCl<sub>3</sub>, 400 MHz)

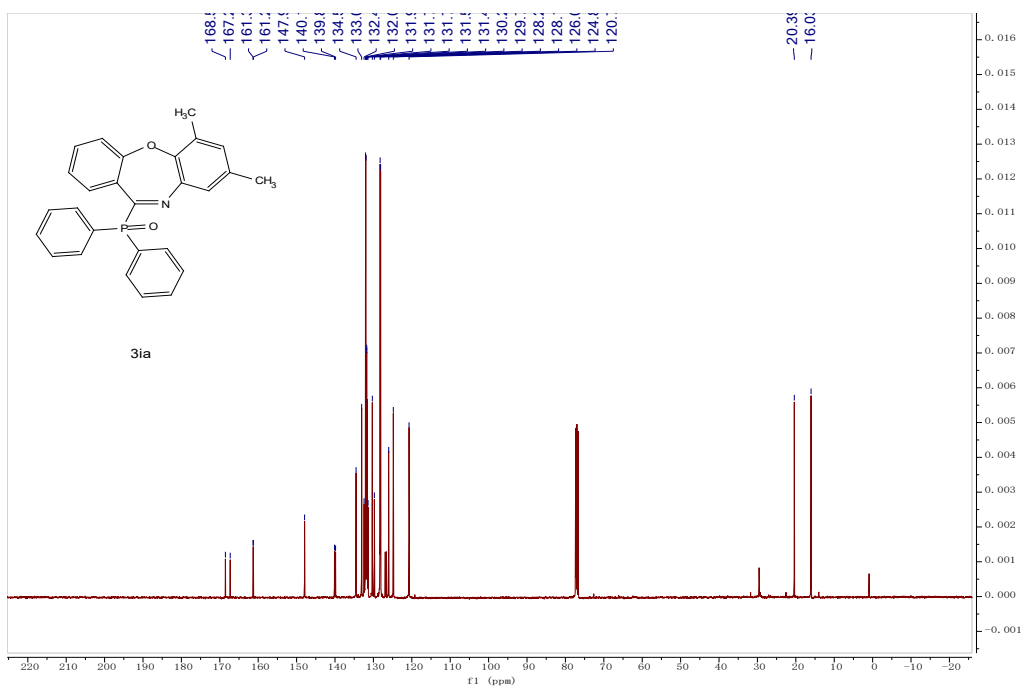

<sup>13</sup>C NMR spectrum of 3ia (CDCl<sub>3</sub>, 101 MHz)

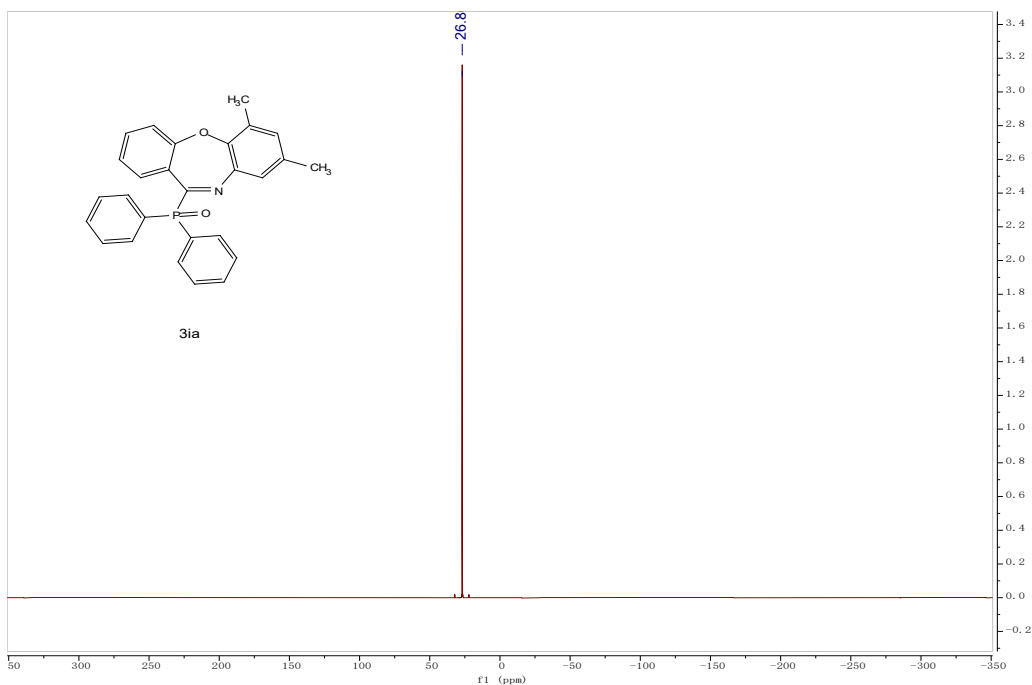

<sup>31</sup>P NMR spectrum of 3ia (CDCl<sub>3</sub>, 162 MHz)

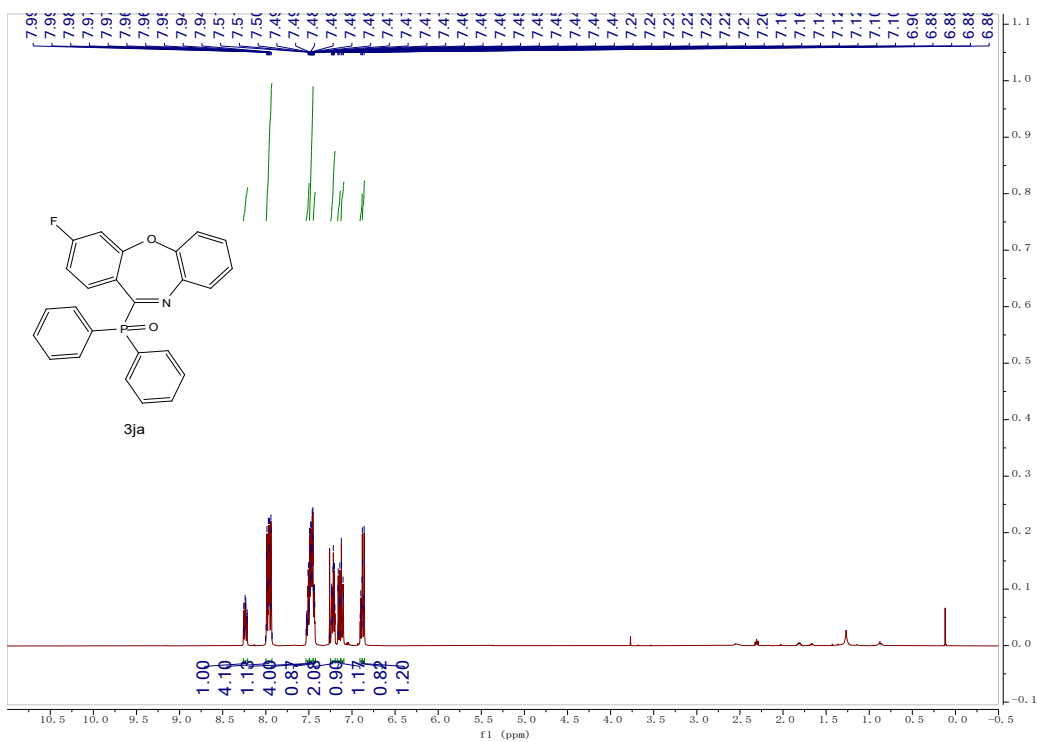

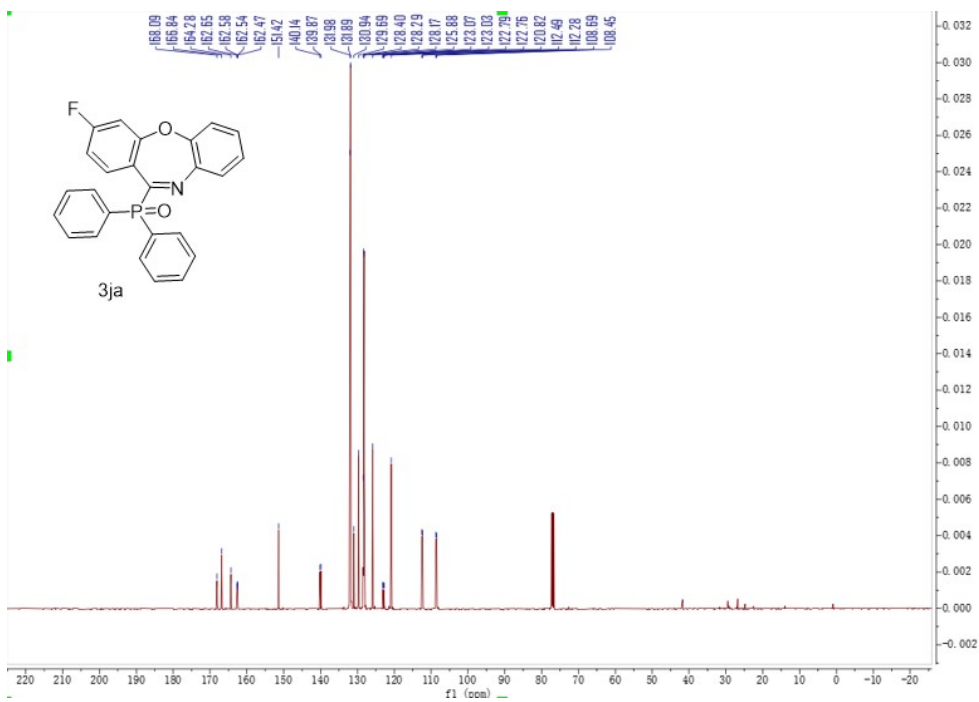

$^{13}\text{C}$  NMR spectrum of 3ja ( $\text{CDCl}_3$ , 101 MHz)

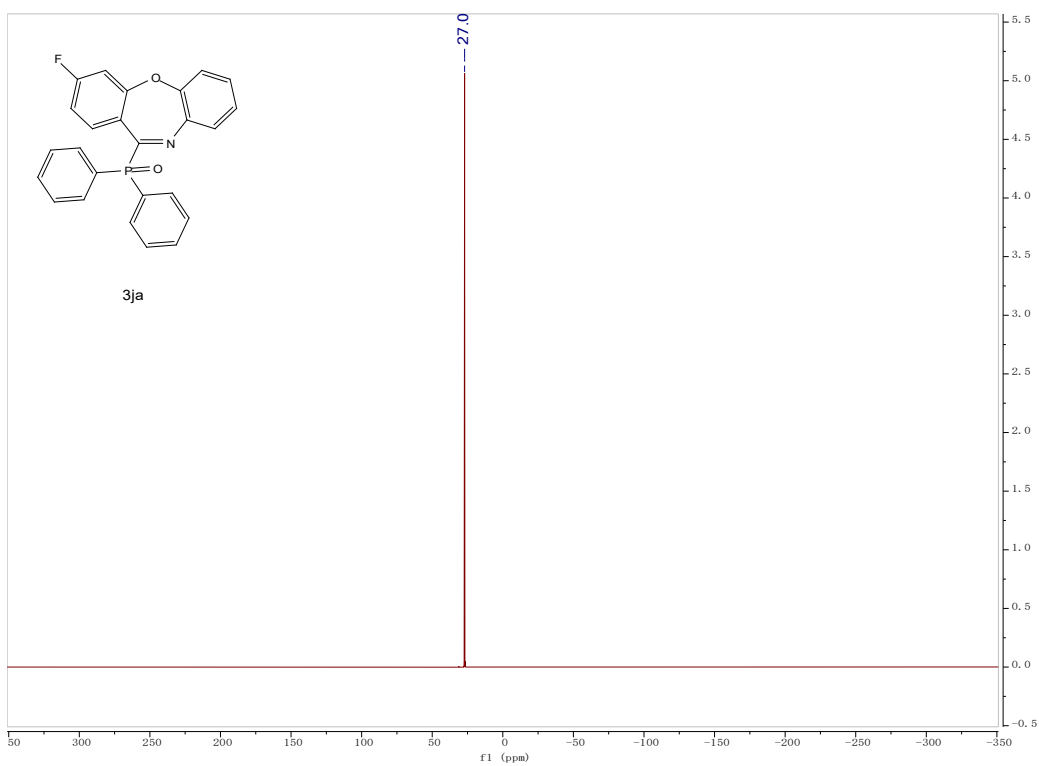

$^{31}\text{P}$  NMR spectrum of 3ja ( $\text{CDCl}_3$ , 162 MHz)

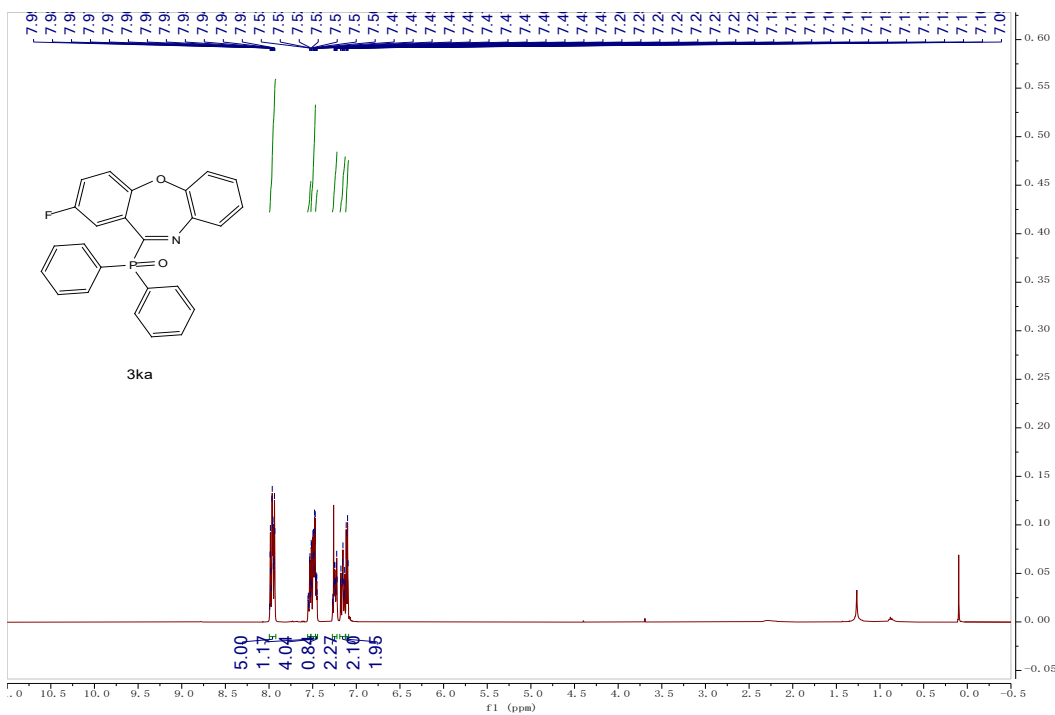

<sup>1</sup>H NMR spectrum of 3ka (CDCl<sub>3</sub>, 400 MHz)

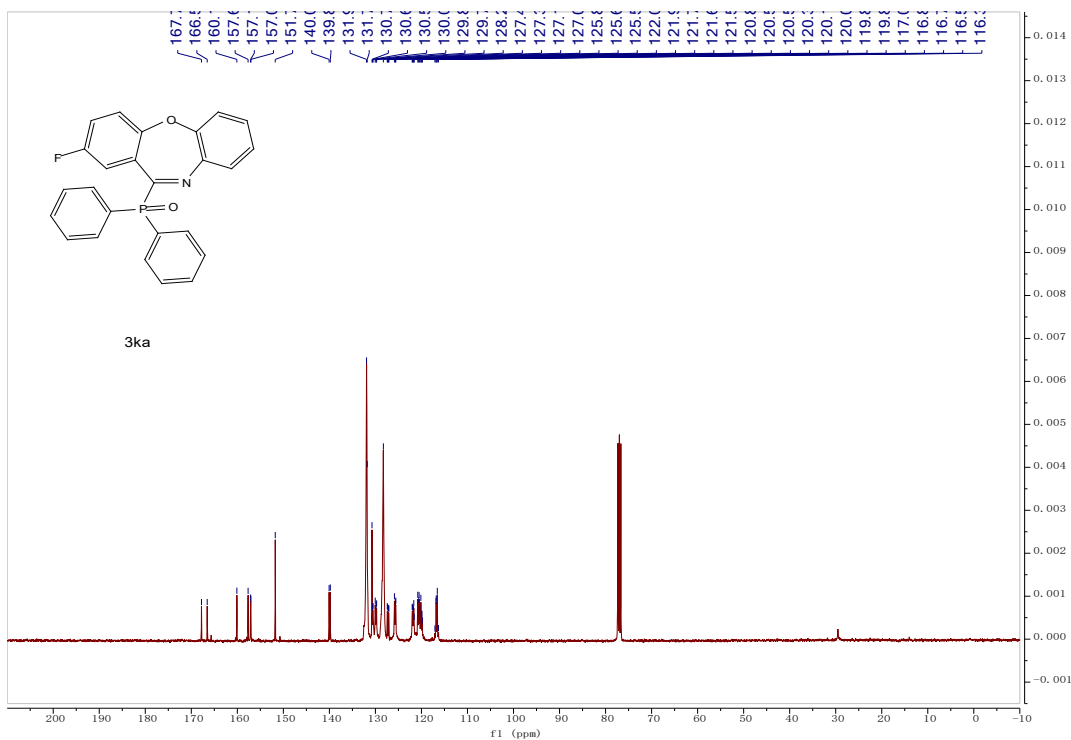

<sup>13</sup>C NMR spectrum of 3ka (CDCl<sub>3</sub>, 101 MHz)





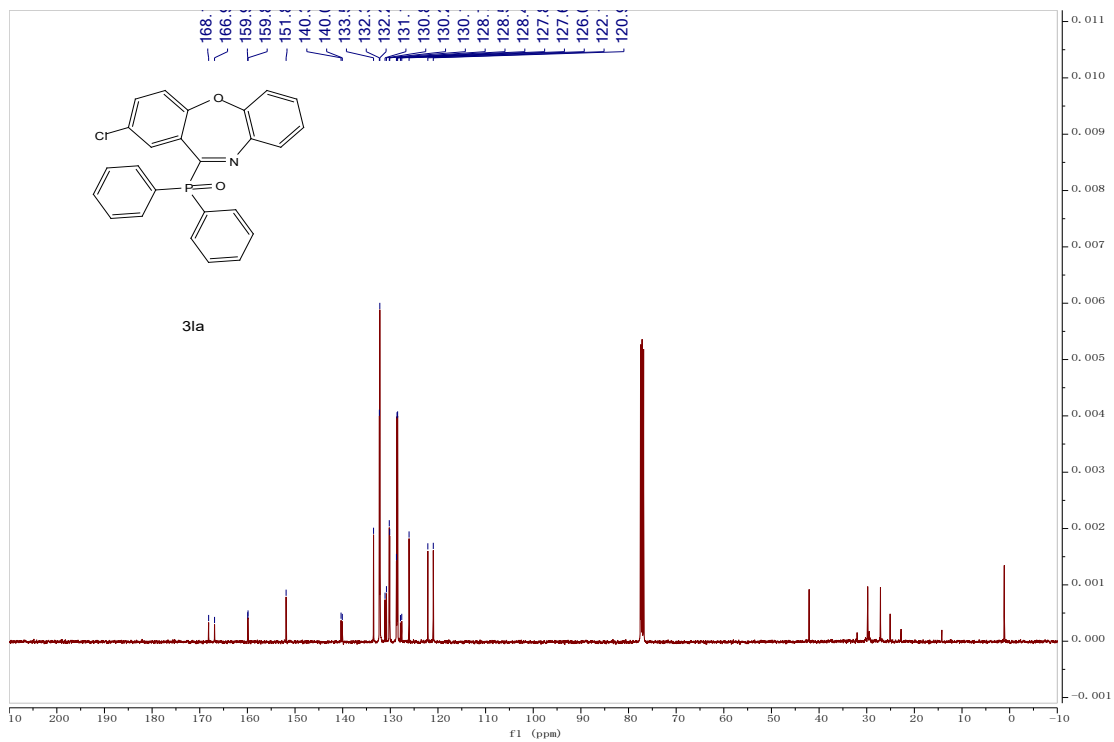

<sup>13</sup>C NMR spectrum of 3la (CDCl<sub>3</sub>, 101 MHz)

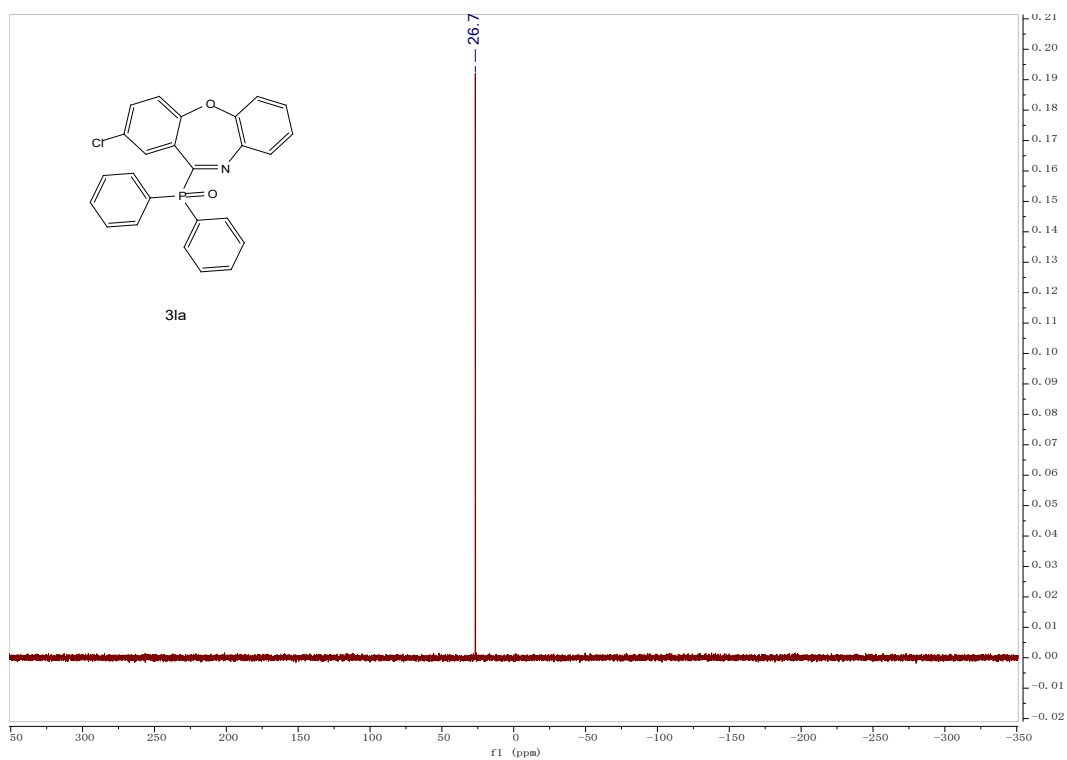

<sup>31</sup>P NMR spectrum of 3la (CDCl<sub>3</sub>, 162 MHz)



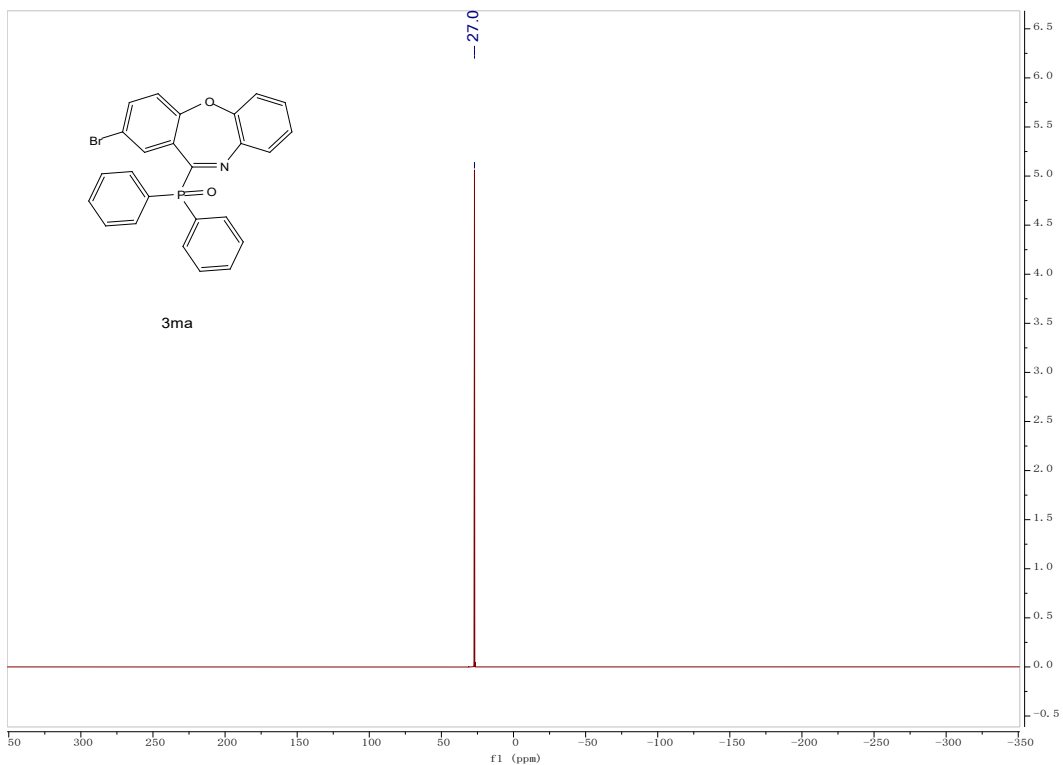

<sup>31</sup>P NMR spectrum of 3ma (CDCl<sub>3</sub>, 162 MHz)

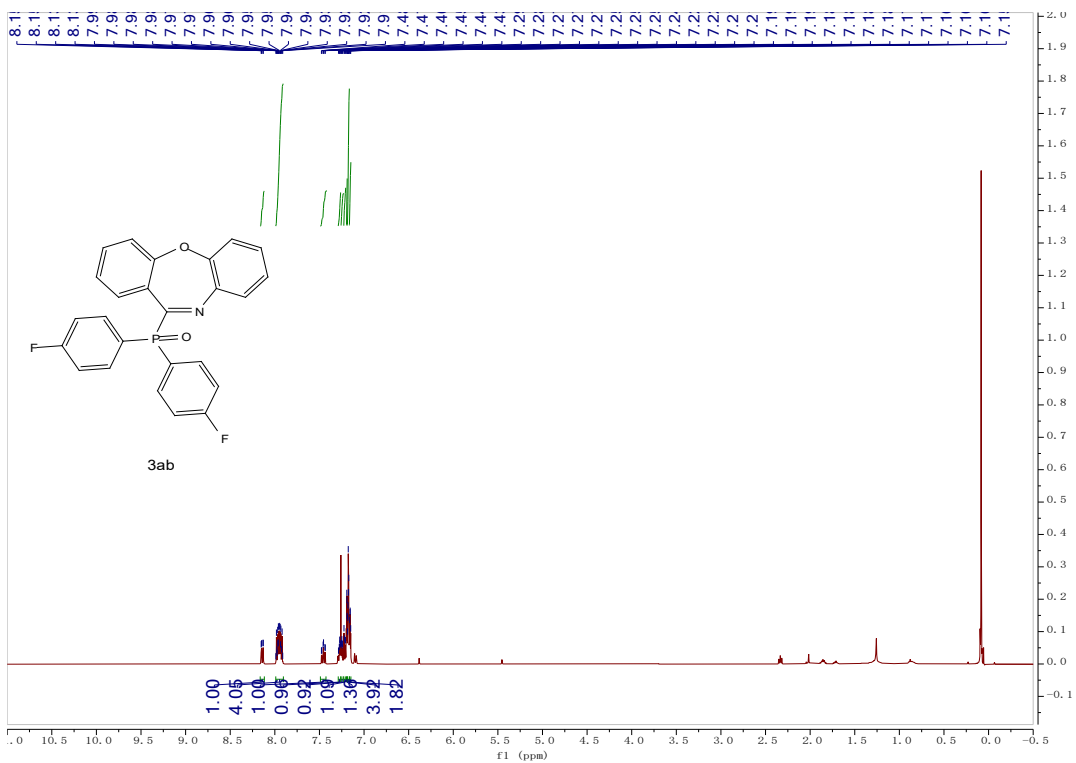

<sup>1</sup>H NMR spectrum of 3ab (CDCl<sub>3</sub>, 400 MHz)

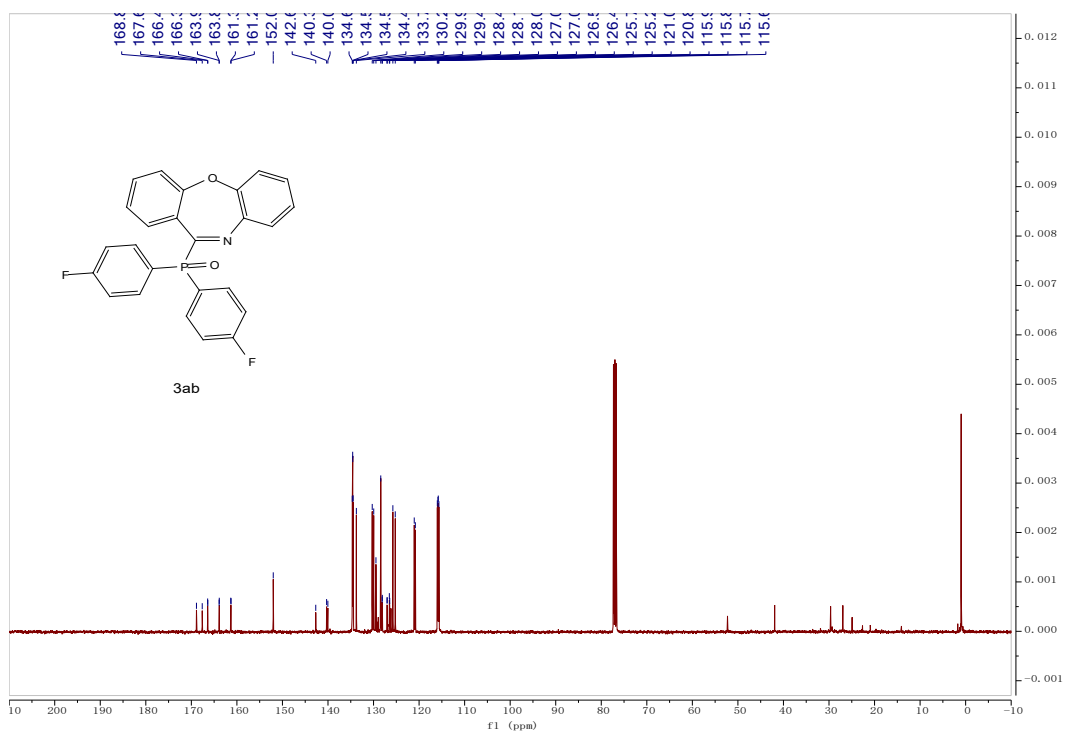

<sup>13</sup>C NMR spectrum of 3ab (CDCl<sub>3</sub>, 101 MHz)

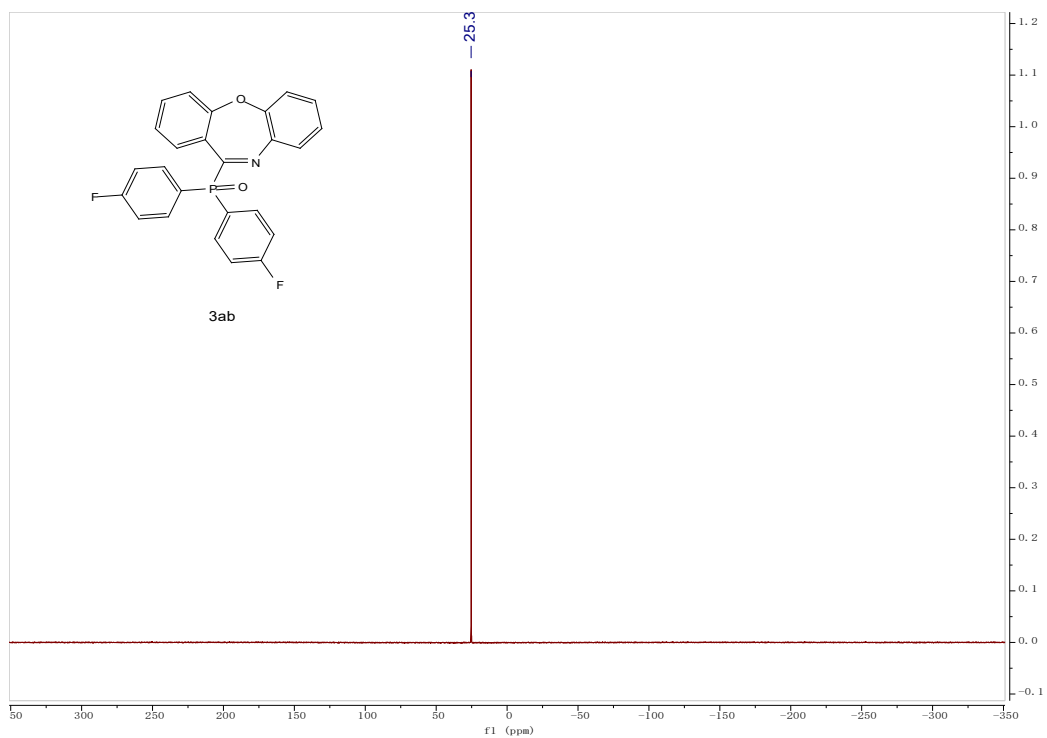

<sup>31</sup>P NMR spectrum of 3ab (CDCl<sub>3</sub>, 162 MHz)

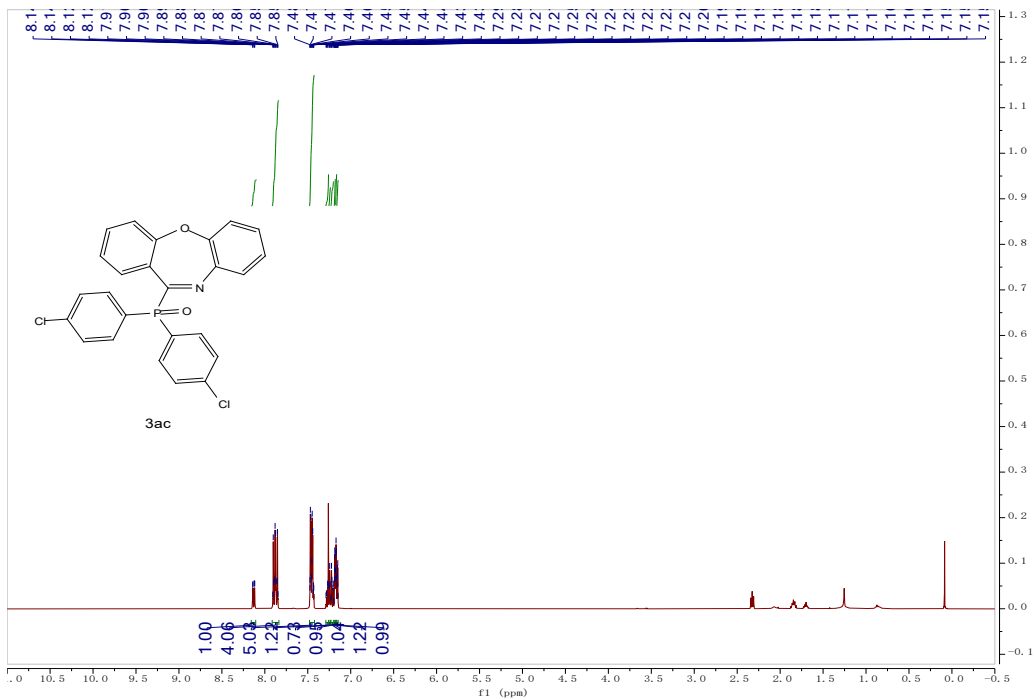

$^1\text{H}$  NMR spectrum of 3ac ( $\text{CDCl}_3$ , 400 MHz)

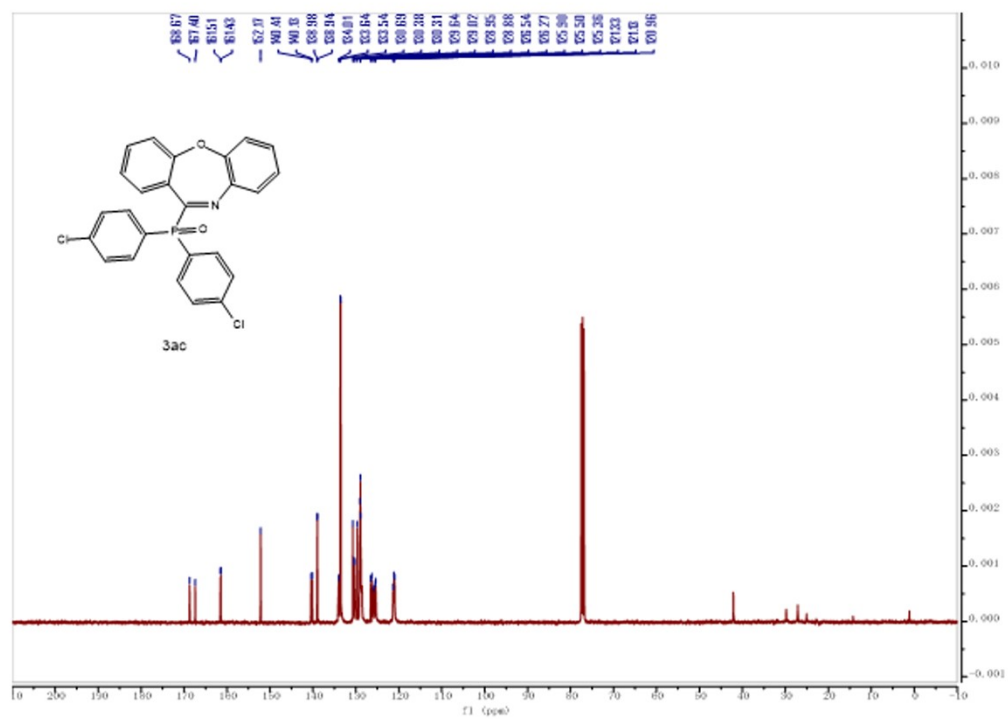

$^{13}\text{C}$  NMR spectrum of 3ac ( $\text{CDCl}_3$ , 101 MHz)

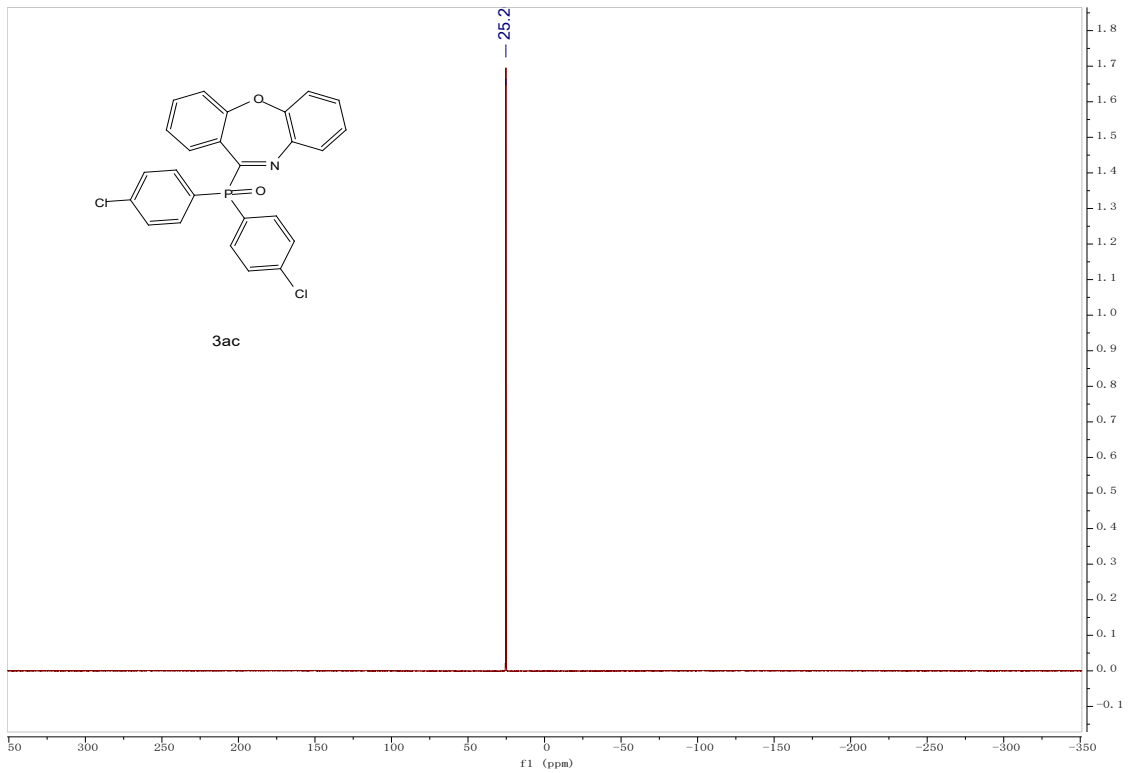

<sup>31</sup>P NMR spectrum of 3ac (CDCl<sub>3</sub>, 162 MHz)

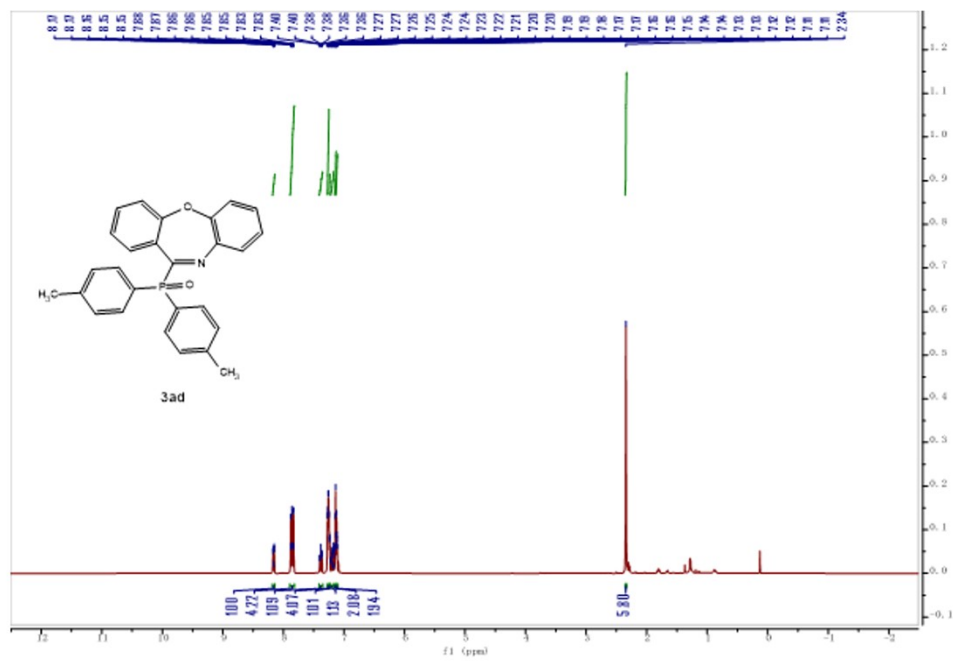

<sup>1</sup>H NMR spectrum of 3ad (CDCl<sub>3</sub>, 400 MHz)





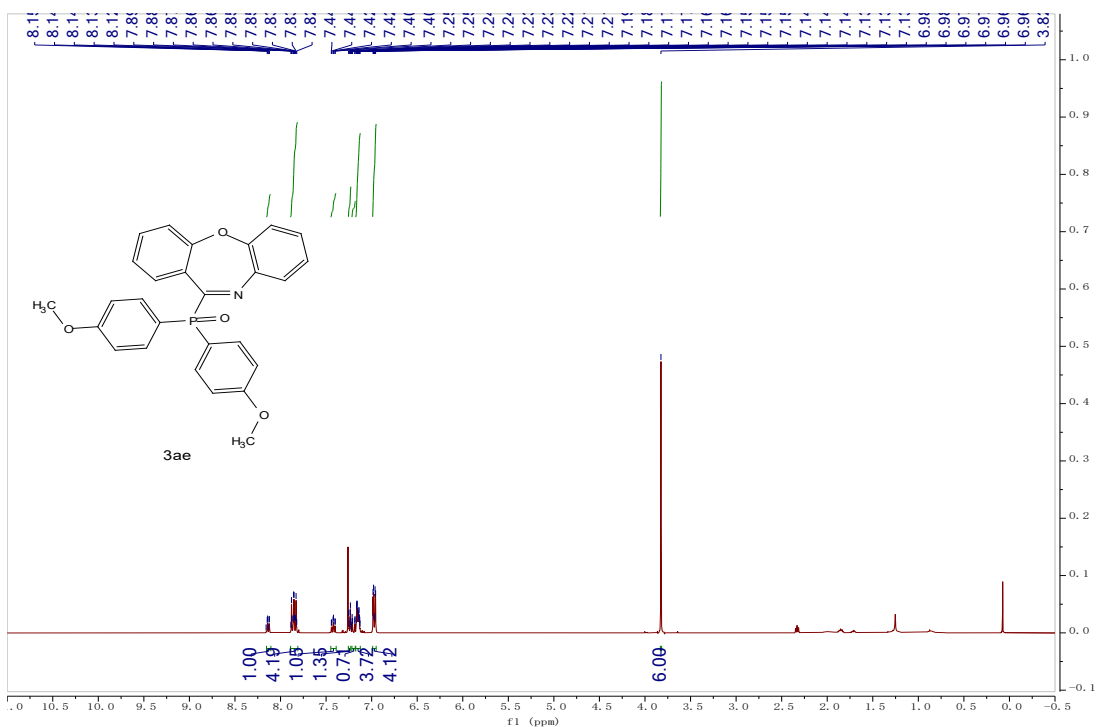

<sup>1</sup>H NMR spectrum of 3ae (CDCl<sub>3</sub>, 400 MHz)

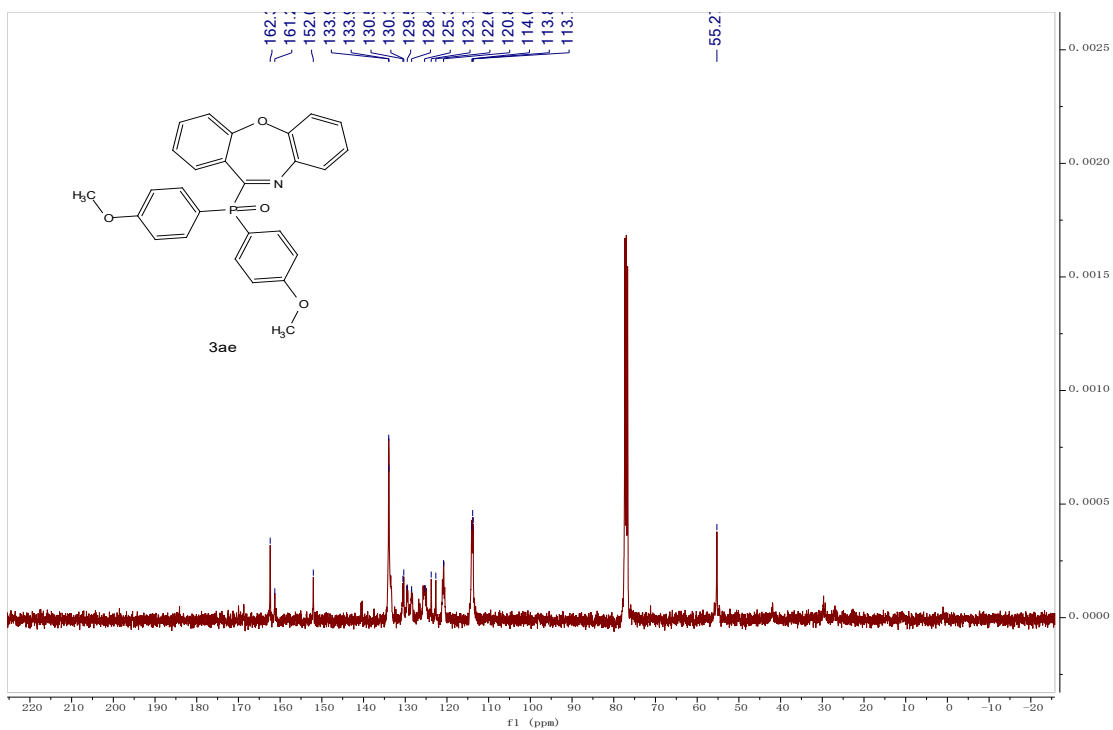

<sup>13</sup>C NMR spectrum of 3ae (CDCl<sub>3</sub>, 101 MHz)

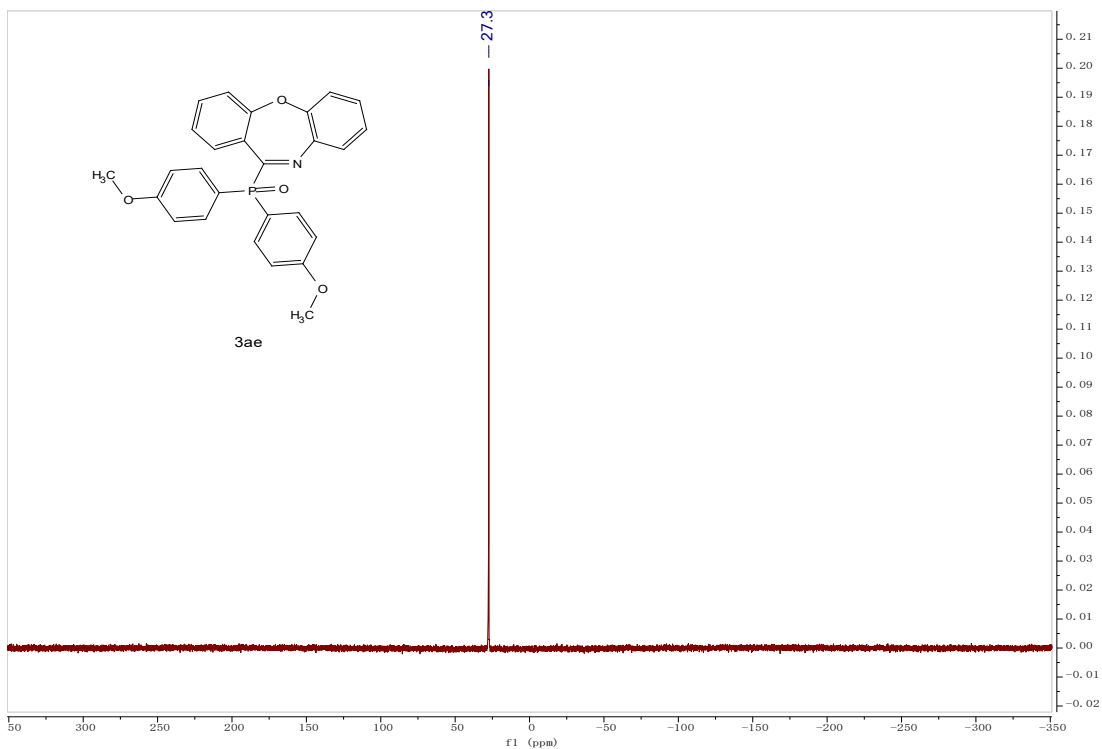

$^{31}\text{P}$  NMR spectrum of **3ae** ( $\text{CDCl}_3$ , 162 MHz)

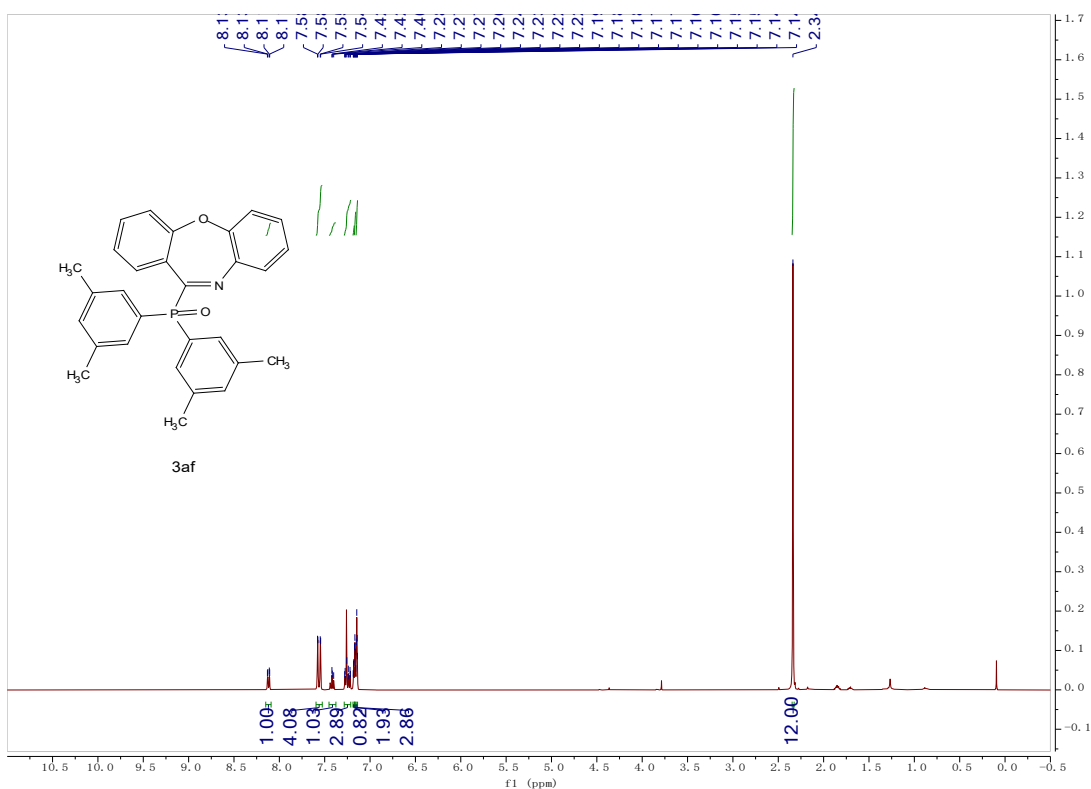

$^1\text{H}$  NMR spectrum of **3af** ( $\text{CDCl}_3$ , 400 MHz)

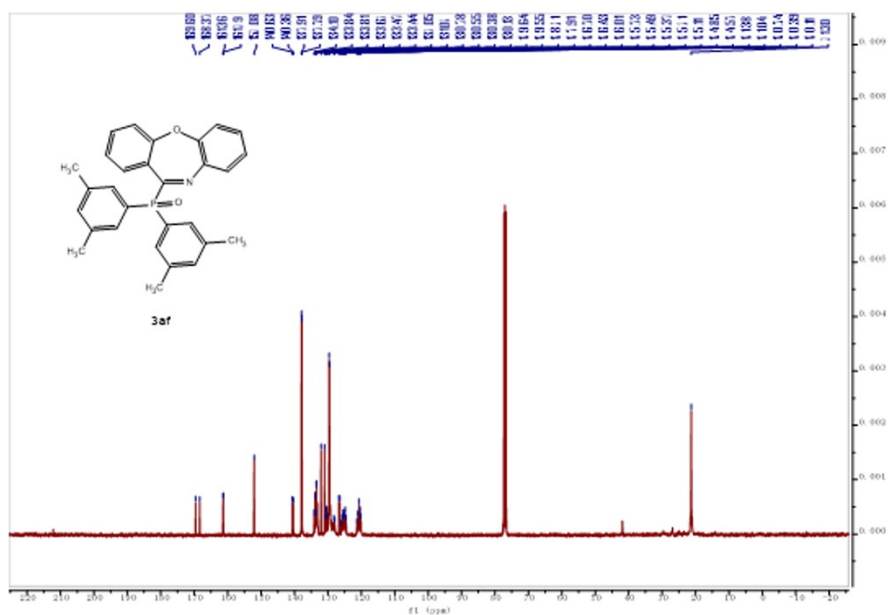

$^{13}\text{C}$  NMR spectrum of 3af ( $\text{CDCl}_3$ , 101 MHz)

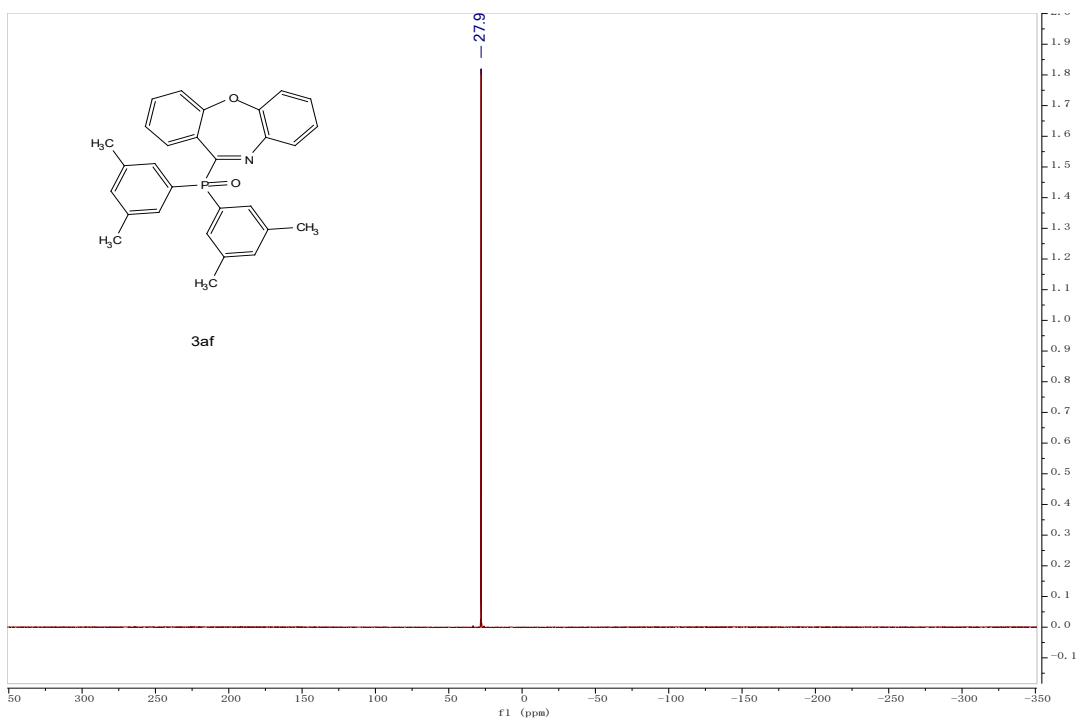

$^{31}\text{P}$  NMR spectrum of 3af ( $\text{CDCl}_3$ , 162 MHz)

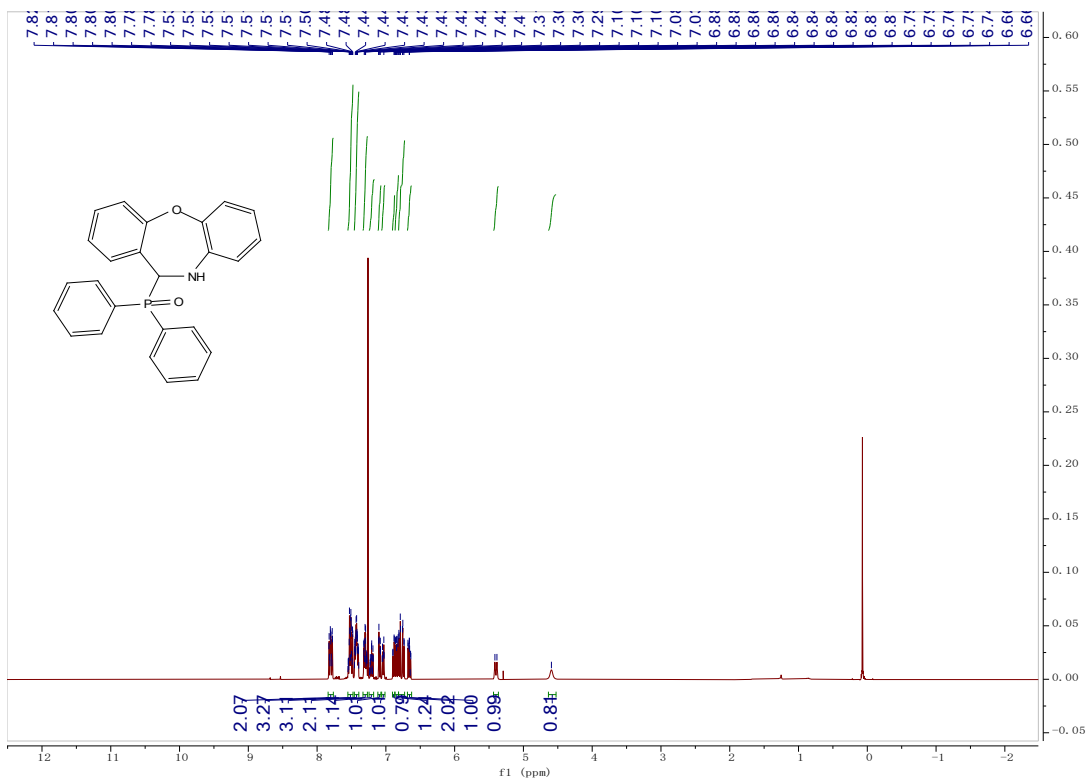

<sup>1</sup>H NMR spectrum of B (CDCl<sub>3</sub>, 400 MHz)

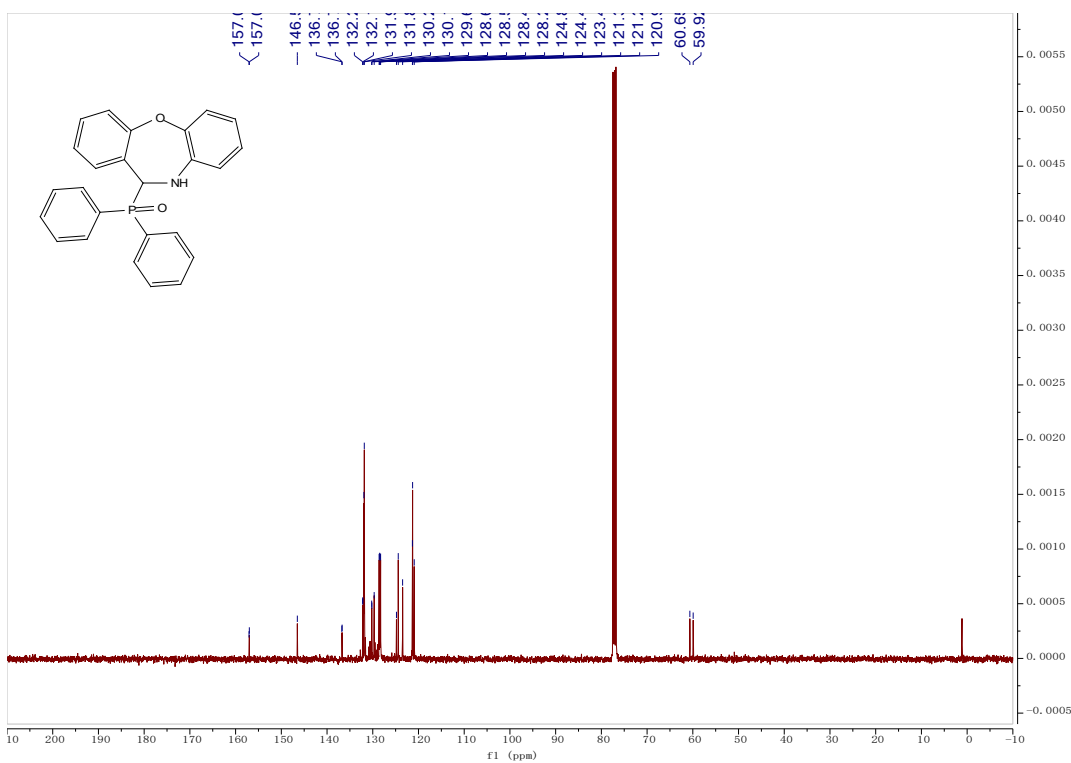

<sup>13</sup>C NMR spectrum of B (CDCl<sub>3</sub>, 101 MHz)

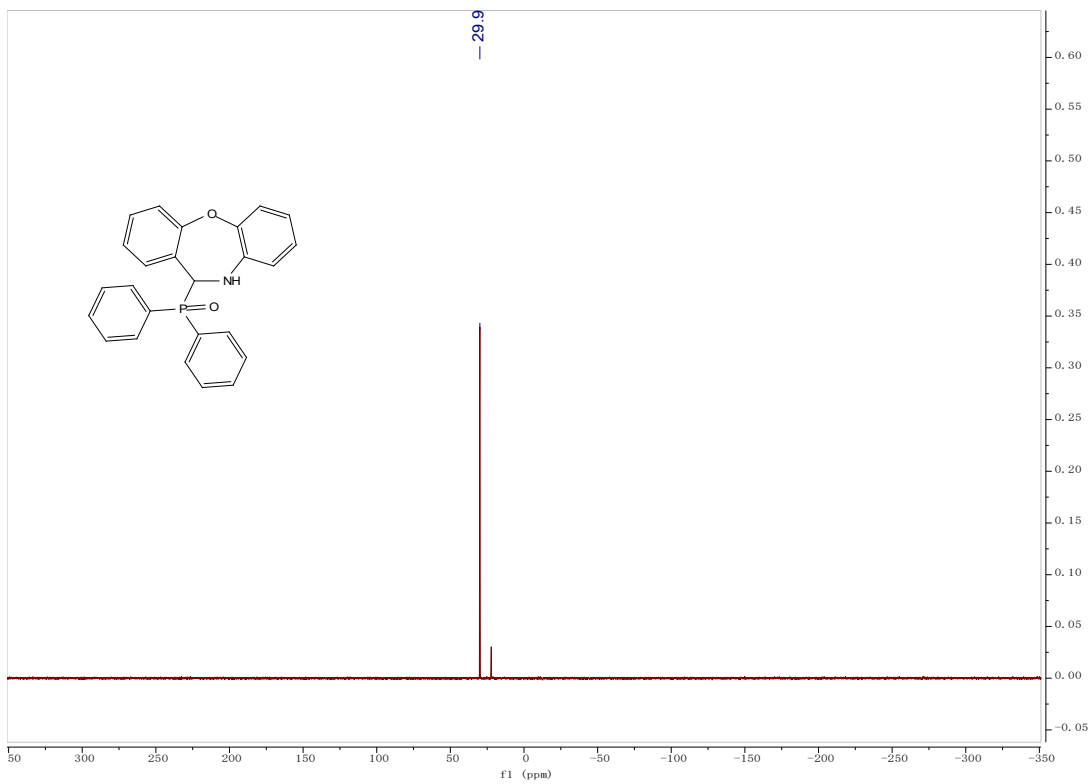

$^{31}\text{P}$  NMR spectrum of B ( $\text{CDCl}_3$ , 162 MHz)
